# Supplementary material
Source: HighWire-hosted journal article supplement (https://thorax.bmj.com/content/75/8/679)

**Supplementary figure 2. Volcano plot of metabolomic changes in patients with decrease of forced expiratory volume.** Significantly different metabolites at 10% False Discovery Rate (FDR) ( $y$ -axis) with  $|\log_2 \text{Fold Change (FC)}| < 0.4$  ( $x$ -axis) between FEV<sub>1</sub> T1 ( $n = 16$ ) and T2 ( $n = 17$ ) both not treated with rapamycin (for group definitions, see supplementary table 3). Blue and grey dots indicate metabolites that are significantly different between conditions at 10% FDR with  $|\log_2 \text{FC}| < 0.4$  and overall NS = non-significant, respectively. Full results are provided in supplementary table 5.

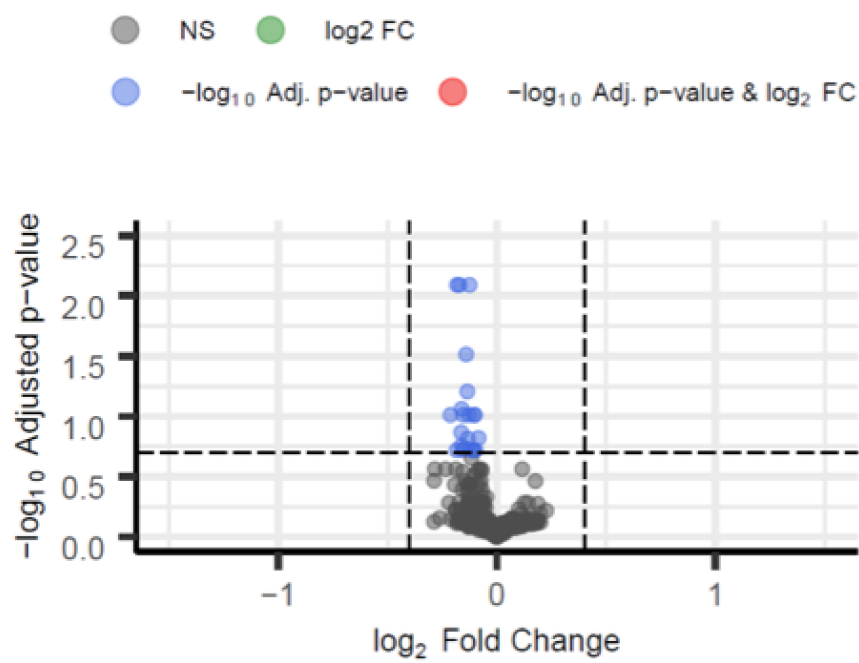

Supplement: inline-supplementary-material-6 [file inline-supplementary-material-6.pdf]
