# Supplementary material
Source: HighWire-hosted journal article supplement (https://thorax.bmj.com/content/75/8/679)

**Supplementary figure 3. Volcano plot of fatty acids and phospholipids across overall disease burden.** Significantly different metabolites at 10% False Discovery Rate (FDR) ( $y$ -axis) with  $|\log_2 \text{Fold Change (FC)}| > 0.4$  ( $x$ -axis) in patients not treated with rapamycin between overall disease burden score (**A**) S2 ( $n = 23$ ) and S3 (highest,  $n = 2$ ) and (**B**) S0 ( $n = 8$ ) and S3 (highest,  $n = 2$ ) (for group definitions, see supplementary table 3). Red, blue, green and grey dots indicate metabolites that are significantly different between conditions at 10% FDR with  $|\log_2 \text{FC}| > 0.4$ , metabolites significant at 10% FDR with  $|\log_2 \text{FC}| < 0.4$ , non-significant at 10% FDR with  $|\log_2 \text{FC}| > 0.4$  and overall NS = non-significant, respectively. \*Compounds identified without confirmation by a standard. Full results are presented in supplementary table 5.

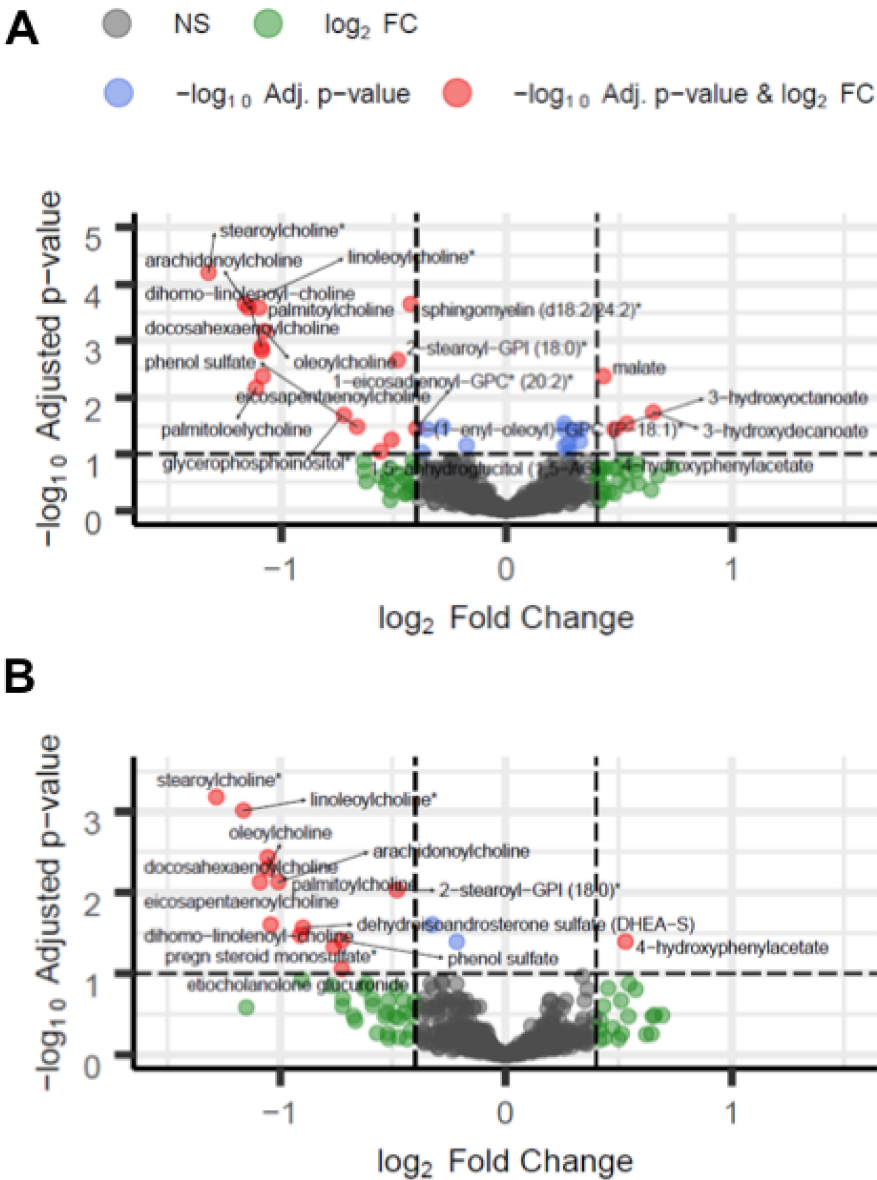

Supplement: inline-supplementary-material-7 [file inline-supplementary-material-7.pdf]
