# Supplementary material
Source: HighWire-hosted journal article supplement (https://thorax.bmj.com/content/75/8/679)

**Supplementary figure 4. Volcano plot of mTOR inhibition on the TSC-LAM.** Differential metabolites at 10% False Discovery Rate (FDR) (y-axis) with  $|\log_2 \text{Fold Change (FC)}| > 0.4$  (x-axis) between TSC-LAM without ( $n = 7$ ) and with ( $n = 5$ ) mTOR inhibitor treatment. Green and grey dots indicate metabolites that are non-significant at 10% FDR with  $|\log_2 \text{FC}| > 0.4$  and overall NS = non-significant, respectively. Full results are presented in supplementary table 5.

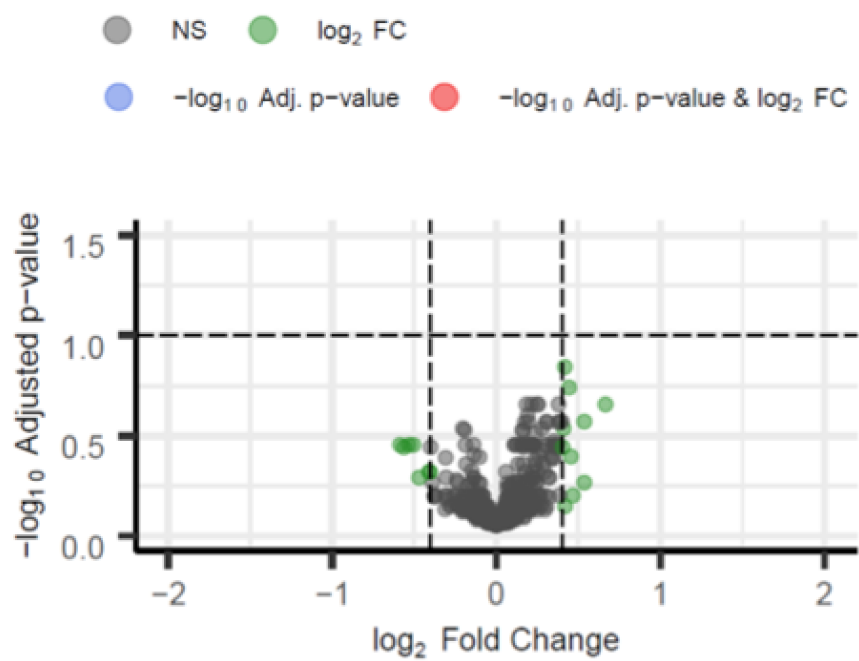

Supplement: inline-supplementary-material-10 [file inline-supplementary-material-10.pdf]
