# Supplementary material
Source: HighWire-hosted journal article supplement (https://thorax.bmj.com/content/75/8/679)
Supplement: inline-supplementary-material-11 [file inline-supplementary-material-11.xlsx]

## Sheet: Supp. table 6
Supplementary table 6. Differential metabolites analysis after removing the effect of age, sex, BMI, ethnicity and experiment run day and excluding metabolites of unknown identity and the 'Xenobiotics' super-pathway. The contrast considered in the analysis is highlighted at the top of the column with groups described in supplementary table 3. Light green fill with dark green text cells indicate n…
Biochemical me	Super-pathway	Sub-pathway	Comp ID	Platform	RI	Mass	Cass ID	Pubchem ID	KEGG ID	HMDB ID	TSC-LAM untreated vs TSC-LAM rapamycin treated
											log2 Fold Change	Adjusted p-value	Module colour
1-(1-enyl-oleoyl)-2-docosahexaenoyl-GPE (P-18:1/22:6)*	Lipid	Plasmalogen	55037	LC/MS Pos Late	2112	774.543		52925039		HMDB0011460	0.154101	0.658703	yellow
1-(1-enyl-oleoyl)-GPC (P-18:1)*	Lipid	Lysoplasmalogen	52701	LC/MS Pos Late	1547	506.361		24779513	C04230	HMDB0010408	0.152572	0.754715	blue
1-(1-enyl-oleoyl)-GPE (P-18:1)*	Lipid	Lysoplasmalogen	44621	LC/MS Pos Late	1566	464.314					0.119534	0.754715	grey
1-(1-enyl-palmitoyl)-2-arachidonoyl-GPC (P-16:0/20:4)*	Lipid	Plasmalogen	52689	LC/MS Pos Late	2154	766.574		24779388		HMDB0011220	-0.0623911	0.84262	yellow
1-(1-enyl-palmitoyl)-2-arachidonoyl-GPE (P-16:0/20:4)*	Lipid	Plasmalogen	52673	LC/MS Pos Late	2270	724.528		52925126		HMDB0011352	-0.00653977	0.941985	grey
1-(1-enyl-palmitoyl)-2-dihomo-linolenoyl-GPC (P-16:0/20:3)*	Lipid	Plasmalogen	52714	LC/MS Pos Late	2264	768.59					0.0177727	0.930261	brown
1-(1-enyl-palmitoyl)-2-docosahexaenoyl-GPC (P-16:0/22:6)*	Lipid	Plasmalogen	52630	LC/MS Pos Late	2041	790.574					0.160868	0.689433	brown
1-(1-enyl-palmitoyl)-2-docosahexaenoyl-GPE (P-16:0/22:6)*	Lipid	Plasmalogen	52672	LC/MS Pos Late	2181	748.528		5283497	C00350	HMDB0005780	0.0780203	0.788578	brown
1-(1-enyl-palmitoyl)-2-eicosapentaenoyl-GPE (P-16:0/20:5)*	Lipid	Plasmalogen	55008	LC/MS Pos Late	2102	722.512					0.0951218	0.859279	brown
1-(1-enyl-palmitoyl)-2-linoleoyl-GPC (P-16:0/18:2)*	Lipid	Plasmalogen	52682	LC/MS Pos Late	2226	742.574		24779386		HMDB0011211	-0.0778157	0.788578	blue
1-(1-enyl-palmitoyl)-2-linoleoyl-GPE (P-16:0/18:2)*	Lipid	Plasmalogen	52677	LC/MS Pos Late	2351	700.528		52925127		HMDB0011343	-0.0843542	0.788578	grey
1-(1-enyl-palmitoyl)-2-myristoyl-GPC (P-16:0/14:0)*	Lipid	Plasmalogen	52715	LC/MS Pos Late	2220	690.543		52923874		HMDB0011203	-0.0729549	0.867608	greenyellow
1-(1-enyl-palmitoyl)-2-oleoyl-GPC (P-16:0/18:1)*	Lipid	Plasmalogen	52478	LC/MS Pos Late	2443	744.59					-0.0352545	0.880414	brown
1-(1-enyl-palmitoyl)-2-oleoyl-GPE (P-16:0/18:1)*	Lipid	Plasmalogen	52477	LC/MS Pos Late	2600	702.543		52925128		HMDB0011342	-0.184715	0.44471	brown
1-(1-enyl-palmitoyl)-2-palmitoleoyl-GPC (P-16:0/16:1)*	Lipid	Plasmalogen	52713	LC/MS Pos Late	2218	716.559		52923882		HMDB0011207	-0.104656	0.754715	brown
1-(1-enyl-palmitoyl)-2-palmitoyl-GPC (P-16:0/16:0)*	Lipid	Plasmalogen	52716	LC/MS Pos Late	2454	718.574		11146967		HMDB0011206	-0.0785757	0.754715	greenyellow
1-(1-enyl-palmitoyl)-GPC (P-16:0)*	Lipid	Lysoplasmalogen	52474	LC/MS Pos Late	1547	480.345		10917802		HMDB0010407	0.0682278	0.867608	yellow
1-(1-enyl-palmitoyl)-GPE (P-16:0)*	Lipid	Lysoplasmalogen	39270	LC/MS Pos Late	1558	438.298					0.0810107	0.799905	brown
1-(1-enyl-stearoyl)-2-arachidonoyl-GPC (P-18:0/20:4)	Lipid	Plasmalogen	52613	LC/MS Pos Late	2350	794.606		24779390		HMDB0011253	0.0664894	0.867608	grey
1-(1-enyl-stearoyl)-2-arachidonoyl-GPE (P-18:0/20:4)*	Lipid	Plasmalogen	52475	LC/MS Pos Late	2511	752.559	103597-60-0	9547058	C00350	HMDB0005779	0.00481256	0.943715	brown
1-(1-enyl-stearoyl)-2-dihomo-linolenoyl-GPE (P-18:0/20:3)*	Lipid	Plasmalogen	57343	LC/MS Pos Late	2669	754.574		52925088		HMDB0011384	-0.0825374	0.874433	brown
1-(1-enyl-stearoyl)-2-docosahexaenoyl-GPC (P-18:0/22:6)*	Lipid	Plasmalogen	52704	LC/MS Pos Late	2235	818.606		42607430		HMDB0011262	0.188092	0.658703	brown
1-(1-enyl-stearoyl)-2-docosahexaenoyl-GPE (P-18:0/22:6)*	Lipid	Plasmalogen	52476	LC/MS Pos Late	2401	776.559		42607458		HMDB0011394	0.143852	0.660921	brown
1-(1-enyl-stearoyl)-2-docosapentaenoyl-GPE (P-18:0/22:5n3)*	Lipid	Plasmalogen	57342	LC/MS Pos Late	2500	778.574					-0.0456484	0.867608	brown
1-(1-enyl-stearoyl)-2-linoleoyl-GPC (P-18:0/18:2)*	Lipid	Plasmalogen	52712	LC/MS Pos Late	2461	770.606					-0.0228785	0.924542	red
1-(1-enyl-stearoyl)-2-linoleoyl-GPE (P-18:0/18:2)*	Lipid	Plasmalogen	52748	LC/MS Pos Late	2633	728.559		52925079		HMDB0011376	-0.134879	0.658703	greenyellow
1-(1-enyl-stearoyl)-2-oleoyl-GPC (P-18:0/18:1)	Lipid	Plasmalogen	52612	LC/MS Pos Late	2724	772.621		42607428		HMDB0011243	0.0186818	0.924948	brown
1-(1-enyl-stearoyl)-2-oleoyl-GPE (P-18:0/18:1)	Lipid	Plasmalogen	52614	LC/MS Pos Late	2950	730.574		42607457		HMDB0011375	-0.10837	0.706569	brown
1-(1-enyl-stearoyl)-GPC (P-18:0) *	Lipid	Lysoplasmalogen	52702	LC/MS Pos Late	1645	508.376		24779527	C04230	HMDB0013122	0.166282	0.751128	black
1-(1-enyl-stearoyl)-GPE (P-18:0)*	Lipid	Lysoplasmalogen	39271	LC/MS Pos Late	1649	466.329					0.0847533	0.810221	brown
1,2-dilinoleoyl-GPC (18:2/18:2)	Lipid	Phospholipid Metabolism	52603	LC/MS Pos Late	2006	782.569		5288075		HMDB0008138	-0.14971	0.56057	brown
1,2-dilinoleoyl-GPE (18:2/18:2)*	Lipid	Phospholipid Metabolism	53174	LC/MS Pos Late	2083	740.523		9546812		HMDB0009093	-0.0865884	0.874433	red
1,2-dipalmitoyl-GPC (16:0/16:0)	Lipid	Phospholipid Metabolism	19130	LC/MS Pos Late	2365	734.569	63-89-8	452110	C00157	HMDB0000564	-0.0777219	0.658703	grey
1,2-dipalmitoyl-GPE (16:0/16:0)*	Lipid	Phospholipid Metabolism	57341	LC/MS Pos Late	2498	692.523					0.0676901	0.874433	brown
1,5-anhydroglucitol (1,5-AG)	Carbohydrate	Glycolysis, Gluconeogenesis, and Pyruvate Metabolism	20675	LC/MS Neg	802	163.061	154-58-5	64960	C07326	HMDB0002712	-0.024885	0.924948	brown
10-heptadecenoate (17:1n7)	Lipid	Long Chain Fatty Acid	33971	LC/MS Neg	5555	267.233	29743-97-3	5312435		HMDB0060038	0.0707144	0.917907	purple
10-nonadecenoate (19:1n9)	Lipid	Long Chain Fatty Acid	33972	LC/MS Neg	5780	295.264	73033-09-7	5312513		HMDB0013622	0.0485976	0.924542	grey
10-undecenoate (11:1n1)	Lipid	Medium Chain Fatty Acid	32497	LC/MS Neg	5085.8	183.139	112-38-9	5634	C13910	HMDB0033724	0.0728446	0.877333	brown
12,13-DiHOME	Lipid	Fatty Acid, Dihydroxy	38395	LC/MS Neg	5137	313.238		10236635	C14829	HMDB0004705	-0.0388179	0.924542	black
12-HETE	Lipid	Eicosanoid	37536	LC/MS Neg	5326	319.228	71030-37-0	5312983		HMDB0006111	-0.377772	0.658703	purple
12-HHTrE	Lipid	Eicosanoid	57393	LC/MS Neg	5175	279.197	54397-84-1	5283141	C20388	HMDB0012535	-0.283311	0.753519	purple
13-HODE + 9-HODE	Lipid	Fatty Acid, Monohydroxy	37752	LC/MS Neg	5275	295.228					-0.238886	0.658703	grey
14-HDoHE/17-HDoHE	Lipid	Fatty Acid, Monohydroxy	53034	LC/MS Neg	5296	343.228					-0.0866815	0.874433	green
16a-hydroxy DHEA 3-sulfate	Lipid	Steroid	38168	LC/MS Neg	4240	383.153		20848950		HMDB0062544	0.00774104	0.943887	brown
16-hydroxypalmitate	Lipid	Fatty Acid, Monohydroxy	39609	LC/MS Neg	5236.2	271.228		10466	C18218	HMDB0006294	-0.00752344	0.943715	purple
17alpha-hydroxypregnenolone 3-sulfate	Lipid	Steroid	37482	LC/MS Neg	4800	411.185	2477-77-2	152971		HMDB0000416	-0.0185958	0.924948	brown
17-methylstearate	Lipid	Fatty Acid, Branched	38296	LC/MS Neg	5993	297.28		3083779		HMDB0037397	-0.000652114	0.948692	tan
1-adrenoyl-GPC (22:4)*	Lipid	Lysolipid	52698	LC/MS Pos Late	1512	572.371					0.0198589	0.924948	purple
1-arachidonoyl-GPA (20:4)	Lipid	Lysolipid	46325	LC/MS Neg	5499	457.236					-0.136951	0.754715	brown
1-arachidonoyl-GPC* (20:4)*	Lipid	Lysolipid	33228	LC/MS Pos Late	1460	544.34		24779476	C04230	HMDB0010395	0.0657889	0.8087	brown
1-arachidonoyl-GPE* (20:4)*	Lipid	Lysolipid	35186	LC/MS Pos Late	1470	502.293		42607465		HMDB0011517	0.0359812	0.874433	pink
1-arachidonoyl-GPI* (20:4)*	Lipid	Lysolipid	34214	LC/MS Neg	5482	619.289				HMDB0061690	0.0868428	0.753519	green
1-arachidonylglycerol (20:4)	Lipid	Monoacylglycerol	34397	LC/MS Neg	6250	303.233		44422842		HMDB0011549	0.132902	0.754715	purple
1-arachidoyl-2-arachidonoyl-GPC (20:0/20:4)*	Lipid	Phospholipid Metabolism	55062	LC/MS Pos Late	2523	838.632		24779048		HMDB0008279	-0.0851247	0.874433	brown
1-arachidoyl-GPC (20:0)	Lipid	Lysolipid	45456	LC/MS Pos Late	1706	552.402	108341-80-6	24779473	C04230	HMDB0010390	0.0802577	0.788578	pink
1-behenoyl-GPC (22:0)	Lipid	Lysolipid	39792	LC/MS Pos Late	1785	580.434					0.0718749	0.799905	brown
1-dihomo-linolenoyl-GPE (20:3n3 or 6)*	Lipid	Lysolipid	44630	LC/MS Neg	6032	502.294					-0.0385106	0.879708	green
1-dihomo-linolenylglycerol (20:3)	Lipid	Monoacylglycerol	48341	LC/MS Neg	6400	305.249					0.130202	0.753519	yellow
1-docosahexaenoylglycerol (22:6)	Lipid	Monoacylglycerol	35153	LC/MS Neg	6150	309.222		53480995		HMDB0011587	0.312371	0.346357	yellow
1-docosahexaenoyl-GPC* (22:6)*	Lipid	Lysolipid	33822	LC/MS Pos Late	1455	568.34		10415542	C04230	HMDB0010404	0.309803	0.256427	brown
1-docosahexaenoyl-GPE (22:6)*	Lipid	Lysolipid	44633	LC/MS Pos Late	1450	526.293		53480945		HMDB0011496	0.210448	0.346357	yellow
1-docosapentaenoyl-GPC* (22:5n3)*	Lipid	Lysolipid	37231	LC/MS Pos Late	1462	570.355					0.121648	0.753519	brown
1-docosapentaenoyl-GPC* (22:5n6)*	Lipid	Lysolipid	45675	LC/MS Neg	6050	644.357					0.170018	0.732684	green
1-eicosadienoyl-GPC* (20:2)*	Lipid	Lysolipid	33871	LC/MS Pos Late	1577	548.371		52924053	C04230	HMDB0010392	0.10297	0.783393	pink
1-eicosapentaenoyl-GPC (20:5)*	Lipid	Lysolipid	44563	LC/MS Pos Late	1395	542.324					0.199038	0.658703	grey
1-eicosapentaenoyl-GPE (20:5)*	Lipid	Lysolipid	47888	LC/MS Pos Late	1408	500.277		53480938		HMDB0011489	0.0691774	0.874433	yellow
1-eicosatrienoyl-GPC* (20:3)*	Lipid	Lysolipid	33821	LC/MS Pos Late	1520	546.355	1006703-11-2	52924055	C04230	HMDB0010394	0.037622	0.892516	brown
1-eicosenoyl-GPC (20:1)*	Lipid	Lysolipid	44560	LC/MS Pos Late	1630	550.387		52924051	C04230	HMDB0010391	0.101893	0.689433	yellow
1-heptadecanoyl-GPC (17:0)	Lipid	Lysolipid	44682	LC/MS Pos Late	1566	510.355		24779463	C04230	HMDB0012108	0.080558	0.788578	blue
1-lignoceroyl-GPC (24:0)	Lipid	Lysolipid	49617	LC/MS Pos Late	1907	608.465		24779481	C04230	HMDB0010405	-0.0428074	0.879708	red
1-linolenoylglycerol (18:3)	Lipid	Monoacylglycerol	34393	LC/MS Neg	6214	277.217		53480978		HMDB0011569	0.418062	0.11222	pink
1-linolenoyl-GPC (18:3)*	Lipid	Lysolipid	45951	LC/MS Pos Late	1422	518.324		24779469		HMDB0010388	0.040988	0.892225	grey
1-linolenoyl-GPE (18:3)*	Lipid	Lysolipid	57509	LC/MS Pos Late	1420	476.277					-0.118978	0.788578	greenyellow
1-linoleoyl-2-arachidonoyl-GPC (18:2/20:4n6)*	Lipid	Phospholipid Metabolism	52710	LC/MS Pos Late	1969	806.569		24778979	C00157	HMDB0008147	-0.102267	0.658703	red
1-linoleoyl-2-docosahexaenoyl-GPC (18:2/22:6)*	Lipid	Phospholipid Metabolism	53199	LC/MS Pos Late	1871	830.569		24778983		HMDB0008156	0.0500757	0.873673	blue
1-linoleoyl-2-docosapentaenyol-GPC (18:2/22:5n3)*	Lipid	Phospholipid Metabolism	53211	LC/MS Pos Late	1958	832.585					0.0526795	0.867608	brown
1-linoleoyl-2-eicosapentaenoyl-GPC (18:2/20:5)*	Lipid	Phospholipid Metabolism	53217	LC/MS Pos Late	1870	804.554		52922747		HMDB0008149	0.0104685	0.943715	purple
1-linoleoyl-2-linolenoyl-GPC (18:2/18:3)*	Lipid	Phospholipid Metabolism	53176	LC/MS Pos Late	1939	780.554		52922731		HMDB0008141	-0.0522934	0.89051	pink
1-linoleoylglycerol (18:2)	Lipid	Monoacylglycerol	27447	LC/MS Neg	6477	279.233					0.304238	0.253605	magenta
1-linoleoyl-GPA (18:2)*	Lipid	Lysolipid	52690	LC/MS Neg	5483	433.236		20835023		HMDB0007856	-0.0769478	0.760717	green
1-linoleoyl-GPC (18:2)	Lipid	Lysolipid	34419	LC/MS Pos Late	1465	520.34		11005824		HMDB0010386	-0.0168677	0.922716	yellow
1-linoleoyl-GPE (18:2)*	Lipid	Lysolipid	36600	LC/MS Pos Late	1482	478.293	85046-18-0	52925130		HMDB0011507	-0.0962993	0.759857	brown
1-linoleoyl-GPG (18:2)*	Lipid	Lysolipid	54885	LC/MS Neg	5516	507.273					-0.0308783	0.879708	grey
1-linoleoyl-GPI* (18:2)*	Lipid	Lysolipid	36594	LC/MS Neg	5494	595.289					0.0561503	0.848267	black
1-margaroyl-2-arachidonoyl-GPC (17:0/20:4)*	Lipid	Phospholipid Metabolism	53193	LC/MS Pos Late	2165	796.585					-0.0632131	0.859279	brown
1-margaroyl-2-docosahexaenoyl-GPC (17:0/22:6)*	Lipid	Phospholipid Metabolism	53198	LC/MS Pos Late	2084	820.585					0.284426	0.44471	pink
1-margaroyl-2-linoleoyl-GPC (17:0/18:2)*	Lipid	Phospholipid Metabolism	52500	LC/MS Pos Late	2242	772.585					-0.0109007	0.924948	brown
1-margaroyl-2-oleoyl-GPC (17:0/18:1)*	Lipid	Phospholipid Metabolism	52499	LC/MS Pos Late	2450	774.601					-0.0245204	0.891357	brown
1-margaroylglycerol (17:0)	Lipid	Monoacylglycerol	34391	LC/MS Neg	6571	269.249					0.0680057	0.822127	brown
1-margaroyl-GPE (17:0)*	Lipid	Lysolipid	37419	LC/MS Neg	6218	466.294					0.0509123	0.867608	pink
1-meadoyl-GPC (20:3n9)*	Lipid	Lysolipid	52736	LC/MS Neg	6100	620.357	1199257-41-4	53480467	C04230	HMDB0010393	-0.0381079	0.924948	green
1-methyladenosine	Nucleotide	Purine Metabolism, Adenine containing	15650	LC/MS Pos Early	2120	282.12	15763-06-1	27476	C02494	HMDB0003331	0.0649444	0.602375	brown
1-methylguanidine	Amino Acid	Guanidino and Acetamido Metabolism	48114	LC/MS Pos Early	2149	74.0713	471-29-4	10111	C02294	HMDB0001522	0.0417022	0.877333	brown
1-methylhistamine	Amino Acid	Histidine Metabolism	43831	LC/MS Pos Early	3040	126.103	501-75-7	3614	C05127	HMDB0000898	-0.0355624	0.889849	yellow
1-methylhistidine	Amino Acid	Histidine Metabolism	30460	LC/MS Neg	1227	168.078	332-80-9	92105	C01152	HMDB0000001	0.048202	0.880414	green
1-methylimidazoleacetate	Amino Acid	Histidine Metabolism	32350	LC/MS Pos Early	2064	141.066	2625-49-2	75810	C05828	HMDB0002820	0.0120886	0.924948	yellow
1-methylnicotinamide	Cofactors and Vitamins	Nicotite and Nicotimide Metabolism	27665	LC/MS Pos Early	1940	137.071	3106-60-3	457	C02918	HMDB0000699	0.00668583	0.943715	blue
1-myristoyl-2-arachidonoyl-GPC (14:0/20:4)*	Lipid	Phospholipid Metabolism	53195	LC/MS Pos Late	1914	754.538		24778634		HMDB0007883	-0.0824257	0.860382	brown
1-myristoyl-2-docosahexaenoyl-GPC (14:0/22:6)*	Lipid	Phospholipid Metabolism	53196	LC/MS Pos Late	1859	778.538		24778639		HMDB0007892	0.12549	0.788578	pink
1-myristoyl-2-linoleoyl-GPC (14:0/18:2)*	Lipid	Phospholipid Metabolism	52707	LC/MS Pos Late	1976	730.538		24778624		HMDB0007874	-0.113408	0.753519	grey
1-myristoyl-2-palmitoyl-GPC (14:0/16:0)	Lipid	Phospholipid Metabolism	19258	LC/MS Pos Late	2147	706.538		129657		HMDB0007869	-0.0662139	0.877333	yellow
1-myristoylglycerol (14:0)	Lipid	Monoacylglycerol	35625	LC/MS Neg	6353.3	227.202		10957631		HMDB0011561	0.244768	0.56057	brown
1-myristoyl-GPC (14:0)	Lipid	Lysolipid	45453	LC/MS Pos Late	1428	468.308	20559-16-4	460604		HMDB0010379	0.0146715	0.930261	brown
1-nervonoyl-GPC (24:1n9)*	Lipid	Lysolipid	55071	LC/MS Pos Late	1762	606.449					-0.0106441	0.937319	brown
1-nonadecanoyl-GPC (19:0)	Lipid	Lysolipid	47087	LC/MS Pos Late	1756	538.387					0.121181	0.753519	brown
1-O-hexadecyl-GPC (C16)	Lipid	Lyso-phospho-ether	20458	LC/MS Pos Late	1573	482.361					0.133403	0.769749	blue
1-oleoyl-2-docosahexaenoyl-GPC (18:1/22:6)*	Lipid	Phospholipid Metabolism	52697	LC/MS Pos Late	2011	832.585		24778955		HMDB0008123	0.13239	0.44471	red
1-oleoyl-2-linoleoyl-GPE (18:1/18:2)*	Lipid	Phospholipid Metabolism	52687	LC/MS Pos Late	2270	742.538		9546753		HMDB0009060	0.169991	0.867608	yellow
1-oleoylglycerol (18:1)	Lipid	Monoacylglycerol	21184	LC/MS Neg	6650	281.249		12178130		HMDB0011567	0.350859	0.409172	brown
1-oleoyl-GPC (18:1)	Lipid	Lysolipid	48258	LC/MS Pos Late	1540	522.355	3542-29-8	16081932	C04230	HMDB0002815	0.0260636	0.880414	brown
1-oleoyl-GPE (18:1)	Lipid	Lysolipid	35628	LC/MS Pos Late	1554	480.308	89576-29-4	9547071		HMDB0011506	-0.0886414	0.797707	brown
1-oleoyl-GPG (18:1)*	Lipid	Lysolipid	45968	LC/MS Neg	5610	509.288					-0.0467392	0.859279	greenyellow
1-oleoyl-GPI (18:1)*	Lipid	Lysolipid	36602	LC/MS Neg	5599	597.304					-0.0863272	0.809047	brown
1-palmitoleoyl-2-docosahexaenoyl-GPC (16:1/22:6)*	Lipid	Phospholipid Metabolism	53200	LC/MS Pos Late	1899	804.554					0.0869066	0.874433	pink
1-palmitoleoyl-2-eicosapentaenoyl-GPC (16:1/20:5)*	Lipid	Phospholipid Metabolism	57362	LC/MS Pos Late	1816	778.538		52922465		HMDB0008017	-0.0269444	0.924948	grey
1-palmitoleoylglycerol (16:1)*	Lipid	Monoacylglycerol	52431	LC/MS Neg	6094	253.217		53480976		HMDB0011565	0.342246	0.416085	blue
1-palmitoleoyl-GPC* (16:1)*	Lipid	Lysolipid	33230	LC/MS Pos Late	1450	494.324	76790-27-7	24779461	C04230	HMDB0010383	-0.0663692	0.84262	brown
1-palmitoleoyl-GPE (16:1)*	Lipid	Lysolipid	34565	LC/MS Neg	5691	450.263		53480923		HMDB0011474	-0.30555	0.526721	brown
1-palmitoleoyl-GPI* (16:1)*	Lipid	Lysolipid	36618	LC/MS Neg	5445	569.273					-0.13073	0.810221	yellow
1-palmitoyl-2-adrenoyl-GPC (16:0/22:4)*	Lipid	Phospholipid Metabolism	52706	LC/MS Pos Late	2236	810.601		24778732		HMDB0007988	-0.0480026	0.902141	brown
1-palmitoyl-2-arachidonoyl-GPC (16:0/20:4n6)	Lipid	Phospholipid Metabolism	52462	LC/MS Pos Late	2091	782.569		10747814	C00157	HMDB0007982	-0.0471406	0.788578	brown
1-palmitoyl-2-arachidonoyl-GPE (16:0/20:4)*	Lipid	Phospholipid Metabolism	52464	LC/MS Pos Late	2198	740.523		9546800		HMDB0008937	0.182306	0.56057	brown
1-palmitoyl-2-arachidonoyl-GPI (16:0/20:4)*	Lipid	Phospholipid Metabolism	52467	LC/MS Polar	892	857.519				HMDB0009789	-0.0265528	0.924542	red
1-palmitoyl-2-docosahexaenoyl-GPC (16:0/22:6)	Lipid	Phospholipid Metabolism	52610	LC/MS Pos Late	2023	806.569		6441886		HMDB0007991	0.132082	0.56057	blue
1-palmitoyl-2-docosahexaenoyl-GPE (16:0/22:6)*	Lipid	Phospholipid Metabolism	52465	LC/MS Pos Late	2119	764.523		9546799		HMDB0008946	0.378823	0.19903	brown
1-palmitoyl-2-docosahexaenoyl-GPI (16:0/22:6)*	Lipid	Phospholipid Metabolism	54987	LC/MS Pos Late	2455	900.56					0.150992	0.713872	pink
1-palmitoyl-2-eicosapentaenoyl-GPC (16:0/20:5)*	Lipid	Phospholipid Metabolism	52463	LC/MS Pos Late	1989	780.554		24778723	C00157	HMDB0007984	0.0247239	0.922927	blue
1-palmitoyl-2-eicosapentaenoyl-GPE (16:0/20:5)*	Lipid	Phospholipid Metabolism	53190	LC/MS Pos Late	2065	738.507		52924919		HMDB0008939	0.156441	0.782011	brown
1-palmitoyl-2-linoleoyl-GPC (16:0/18:2)	Lipid	Phospholipid Metabolism	42446	LC/MS Pos Late	2160	758.569		5287971		HMDB0007973	-0.0629262	0.734902	green
1-palmitoyl-2-linoleoyl-GPE (16:0/18:2)	Lipid	Phospholipid Metabolism	42449	LC/MS Pos Late	2275	716.523		9546747		HMDB0008928	0.0992025	0.810221	brown
1-palmitoyl-2-linoleoyl-GPI (16:0/18:2)	Lipid	Phospholipid Metabolism	52450	LC/MS Pos Late	2730	852.56				HMDB0009784	0.0471304	0.887984	brown
1-palmitoyl-2-oleoyl-GPC (16:0/18:1)	Lipid	Phospholipid Metabolism	52461	LC/MS Pos Late	2358	760.585		5497103		HMDB0007972	-0.0370743	0.867608	grey
1-palmitoyl-2-oleoyl-GPE (16:0/18:1)	Lipid	Phospholipid Metabolism	19263	LC/MS Pos Late	2509	718.538		5283496		HMDB0008927	0.20069	0.658703	blue
1-palmitoyl-2-oleoyl-GPI (16:0/18:1)*	Lipid	Phospholipid Metabolism	52669	LC/MS Pos Late	3140	854.575				HMDB0009783	-0.12209	0.788578	red
1-palmitoyl-2-palmitoleoyl-GPC (16:0/16:1)*	Lipid	Phospholipid Metabolism	52470	LC/MS Pos Late	2160	732.554		6443788		HMDB0007969	-0.13809	0.754715	tan
1-palmitoyl-2-palmitoleoyl-GPE (16:0/16:1)*	Lipid	Phospholipid Metabolism	52471	LC/MS Pos Late	2256	690.507		52924925		HMDB0008924	-0.159063	0.788578	grey
1-palmitoyl-2-stearoyl-GPC (16:0/18:0)	Lipid	Phospholipid Metabolism	52616	LC/MS Pos Late	2653	762.601		24778686		HMDB0007970	0.0331247	0.877333	red
1-palmitoylglycerol (16:0)	Lipid	Monoacylglycerol	21127	LC/MS Neg	6550	255.233	32899-41-5	3084463		HMDB0011564	0.223039	0.346357	greenyellow
1-palmitoyl-GPA (16:0)	Lipid	Lysolipid	34428	LC/MS Neg	5600	409.236		89566	C04036	HMDB0007853	-0.0183406	0.924542	grey
1-palmitoyl-GPC (16:0)	Lipid	Lysolipid	33955	LC/MS Pos Late	1525	496.34		460602	C04230	HMDB0010382	0.0254782	0.874433	yellow
1-palmitoyl-GPE (16:0)	Lipid	Lysolipid	35631	LC/MS Pos Late	1544	454.293		9547069		HMDB0011503	0.0871153	0.753519	brown
1-palmitoyl-GPG (16:0)*	Lipid	Lysolipid	45970	LC/MS Neg	5570	483.273					-0.0186191	0.924542	purple
1-palmitoyl-GPI* (16:0)	Lipid	Lysolipid	35305	LC/MS Neg	5564	571.289				HMDB0061695	-0.0136676	0.930261	yellow
1-palmityl-2-arachidonoyl-GPC (O-16:0/20:4)*	Lipid	Phospholipid Metabolism	52718	LC/MS Pos Late	2183	768.59					0.0540549	0.874433	blue
1-palmityl-2-linoleoyl-GPC (O-16:0/18:2)*	Lipid	Phospholipid Metabolism	53175	LC/MS Pos Late	2200	744.59	88542-95-4	6443157		HMDB0011151	-0.00364856	0.943887	tan
1-palmityl-2-oleoyl-GPC (O-16:0/18:1)*	Lipid	Phospholipid Metabolism	52717	LC/MS Pos Late	2456	746.606					-0.0663111	0.787398	blue
1-palmityl-2-palmitoyl-GPC (O-16:0/16:0)*	Lipid	Phospholipid Metabolism	57332	LC/MS Pos Late	2415	720.59					-0.0973757	0.56561	brown
1-palmityl-2-stearoyl-GPC (O-16:0/18:0)*	Lipid	Phospholipid Metabolism	55040	LC/MS Pos Late	2548	748.621		11803170		HMDB0013405	-0.0753121	0.788578	brown
1-palmityl-GPE (O-16:0)*	Lipid	Lyso-phospho-ether	55007	LC/MS Pos Late	1570	440.314					0.0923391	0.859279	brown
1-pentadecanoyl-2-arachidonoyl-GPC (15:0/20:4)*	Lipid	Phospholipid Metabolism	53194	LC/MS Pos Late	1988	768.554		52922330		HMDB0007949	-0.0639406	0.855509	greenyellow
1-pentadecanoyl-2-docosahexaenoyl-GPC (15:0/22:6)*	Lipid	Phospholipid Metabolism	53197	LC/MS Pos Late	1925	792.554		52922342	C00157	HMDB0007958	0.198632	0.658703	brown
1-pentadecanoyl-2-linoleoyl-GPC (15:0/18:2)*	Lipid	Phospholipid Metabolism	52497	LC/MS Pos Late	2057	744.554		24778664	C00157	HMDB0007940	-0.038774	0.884416	grey
1-pentadecanoyl-GPC (15:0)*	Lipid	Lysolipid	37418	LC/MS Pos Late	1474	482.324		24779458	C04230	HMDB0010381	0.0108779	0.930261	red
1-stearoyl-2-adrenoyl-GPC (18:0/22:4)*	Lipid	Phospholipid Metabolism	55061	LC/MS Pos Late	2444	838.632		24778868		HMDB0008054	0.00379064	0.943887	red
1-stearoyl-2-arachidonoyl-GPC (18:0/20:4)	Lipid	Phospholipid Metabolism	42450	LC/MS Pos Late	2300	810.601		16219824		HMDB0008048	0.00401633	0.940483	grey
1-stearoyl-2-arachidonoyl-GPE (18:0/20:4)	Lipid	Phospholipid Metabolism	52447	LC/MS Pos Late	2424	768.554		5289133		HMDB0009003	0.2256	0.346357	brown
1-stearoyl-2-arachidonoyl-GPI (18:0/20:4)	Lipid	Phospholipid Metabolism	52449	LC/MS Pos Late	3000	904.591				HMDB0009815	0.0965446	0.658703	red
1-stearoyl-2-dihomo-linolenoyl-GPC (18:0/20:3n3 or 6)*	Lipid	Phospholipid Metabolism	52629	LC/MS Pos Late	2384	812.616		24778857		HMDB0008047	0.0101736	0.924948	red
1-stearoyl-2-dihomo-linolenoyl-GPE (18:0/20:3n3 or 6)*	Lipid	Phospholipid Metabolism	57336	LC/MS Pos Late	2567	770.569		52924903		HMDB0009002	0.231356	0.658703	brown
1-stearoyl-2-dihomo-linolenoyl-GPI (18:0/20:3n3 or 6)*	Lipid	Phospholipid Metabolism	54984	LC/MS Pos Late	3271	906.607				HMDB0009814	-0.0778244	0.788578	yellow
1-stearoyl-2-docosahexaenoyl-GPC (18:0/22:6)	Lipid	Phospholipid Metabolism	52611	LC/MS Pos Late	2197	834.601		24778876		HMDB0008057	0.236778	0.297551	blue
1-stearoyl-2-docosahexaenoyl-GPE (18:0/22:6)*	Lipid	Phospholipid Metabolism	52466	LC/MS Pos Late	2317	792.554		9546798		HMDB0009012	0.443549	0.155579	pink
1-stearoyl-2-docosahexaenoyl-GPI (18:0/22:6)*	Lipid	Phospholipid Metabolism	52668	LC/MS Pos Late	2800	928.591				HMDB0009821	0.1471	0.753519	yellow
1-stearoyl-2-docosapentaenoyl-GPC (18:0/22:5n3)*	Lipid	Phospholipid Metabolism	52699	LC/MS Pos Late	2282	836.616		24778873		HMDB0008056	0.164066	0.44471	blue
1-stearoyl-2-docosapentaenoyl-GPC (18:0/22:5n6)*	Lipid	Phospholipid Metabolism	52700	LC/MS Pos Late	2369	836.616		24778871		HMDB0008055	0.254516	0.658703	grey
1-stearoyl-2-linoleoyl-GPC (18:0/18:2)*	Lipid	Phospholipid Metabolism	52452	LC/MS Pos Late	2380	786.601		6441487		HMDB0008039	-0.0183799	0.887984	grey
1-stearoyl-2-linoleoyl-GPE (18:0/18:2)*	Lipid	Phospholipid Metabolism	52446	LC/MS Pos Late	2522	744.554		9546749		HMDB0008994	0.124459	0.788578	purple
1-stearoyl-2-linoleoyl-GPI (18:0/18:2)	Lipid	Phospholipid Metabolism	52468	LC/MS Pos Late	3185	880.591			C00626	HMDB0009809	0.0383585	0.879708	pink
1-stearoyl-2-oleoyl-GPC (18:0/18:1)	Lipid	Phospholipid Metabolism	52438	LC/MS Pos Late	2644	788.616		24778825		HMDB0008038	0.0130473	0.924948	purple
1-stearoyl-2-oleoyl-GPE (18:0/18:1)	Lipid	Phospholipid Metabolism	42448	LC/MS Pos Late	2858	746.569		9546742		HMDB0008993	0.0544377	0.887984	yellow
1-stearoyl-2-oleoyl-GPI (18:0/18:1)*	Lipid	Phospholipid Metabolism	52726	LC/MS Pos Late	3711	882.607					-0.0881142	0.788578	green
1-stearoyl-GPC (18:0)	Lipid	Lysolipid	33961	LC/MS Pos Late	1606	524.371		497299	C04230	HMDB0010384	0.0801888	0.689433	green
1-stearoyl-GPE (18:0)	Lipid	Lysolipid	42398	LC/MS Pos Late	1626	482.324		9547068		HMDB0011130	0.131119	0.545915	grey
1-stearoyl-GPI (18:0)	Lipid	Lysolipid	19324	LC/MS Pos Late	1700	601.335				HMDB0061696	0.239077	0.44471	grey
1-stearyl-2-arachidonoyl-GPC (O-18:0/20:4)*	Lipid	Phospholipid Metabolism	57333	LC/MS Pos Late	2378	796.621					0.0198974	0.922716	green
1-stearyl-2-docosapentaenoyl-GPC (O-18:0/22:5n3)*	Lipid	Phospholipid Metabolism	57334	LC/MS Pos Late	2358	822.637					-0.0316582	0.879708	yellow
1-stearyl-GPC (O-18:0)*	Lipid	Lyso-phospho-ether	52703	LC/MS Pos Late	1653	510.392		2733532	C04317	HMDB0011149	0.161335	0.753519	blue
21-hydroxypregnenolone disulfate	Lipid	Steroid	46115	LC/MS Neg	3935	245.067	1164-98-3	247020	C05485	HMDB0004026	0.173574	0.788578	blue
2-aminoadipate	Amino Acid	Lysine Metabolism	6146	LC/MS Polar	3500	160.061	542-32-5	469	C00956	HMDB0000510	0.0297776	0.922927	black
2-aminobutyrate	Amino Acid	Methionine, Cysteine, SAM and Taurine Metabolism	42374	LC/MS Pos Early	2059	104.071	2623-91-8	439691	C02261	HMDB0000650	-0.0345456	0.874433	tan
2-aminoheptanoate	Lipid	Fatty Acid, Amino	43761	LC/MS Pos Early	3160	146.118				HMDB0094649	0.0608038	0.879708	greenyellow
2-aminooctanoate	Lipid	Fatty Acid, Amino	43343	LC/MS Neg	3385	158.119	644-90-6	69522		HMDB0000991	-0.14163	0.759857	tan
2-arachidonoylglycerol (20:4)	Lipid	Monoacylglycerol	19266	LC/MS Neg	6170	303.233	53847-30-6	5282280	C13856	HMDB0004666	0.0184569	0.924948	black
2-arachidonoyl-GPC* (20:4)*	Lipid	Lysolipid	33387	LC/MS Neg	5965	618.341				HMDB0061699	0.0622641	0.836999	grey
2-arachidonoyl-GPE* (20:4)*	Lipid	Lysolipid	32815	LC/MS Neg	5793	500.278					-0.00858057	0.935945	grey
2'-deoxyuridine	Nucleotide	Pyrimidine Metabolism, Uracil containing	52602	LC/MS Neg	1586	227.067	951-78-0	13712	C00526	HMDB0000012	0.0776894	0.817084	brown
2-docosahexaenoyl-GPC* (22:6)*	Lipid	Lysolipid	46203	LC/MS Neg	5760	642.341					0.277983	0.279167	brown
2-docosahexaenoyl-GPE (22:6)*	Lipid	Lysolipid	34258	LC/MS Neg	5707	524.278		53480945		HMDB0011496	0.154927	0.658703	pink
2-hydroxy-3-methylvalerate	Amino Acid	Leucine, Isoleucine and Valine Metabolism	36746	LC/MS Neg	1800	131.071	488-15-3	10796774		HMDB0000317	-0.0957025	0.8087	yellow
2-hydroxyadipate	Lipid	Fatty Acid, Dicarboxylate	31934	LC/MS Polar	3000	161.046	18294-85-4	193530	C02360	HMDB0000321	-0.0287435	0.918261	tan
2-hydroxybutyrate/2-hydroxyisobutyrate	Amino Acid	Methionine, Cysteine, SAM and Taurine Metabolism	52281	LC/MS Polar	1258	103.04					0.0561502	0.884261	purple
2-hydroxydecanoate	Lipid	Fatty Acid, Monohydroxy	42489	LC/MS Neg	4840	187.134				HMDB0094656	-0.136482	0.753519	grey
2-hydroxyglutarate	Lipid	Fatty Acid, Dicarboxylate	37253	LC/MS Polar	3352.8	147.03		43	C02630	HMDB0059655	-0.0774694	0.788578	greenyellow
2-hydroxyoctanoate	Lipid	Fatty Acid, Monohydroxy	22036	LC/MS Neg	3736.8	159.103	617-73-2	94180		HMDB0000711	0.00935669	0.943715	yellow
2-hydroxypalmitate	Lipid	Fatty Acid, Monohydroxy	35675	LC/MS Neg	5511.2	271.228	16452-51-0	11065598		HMDB0031057	0.0790487	0.71845	grey
2-hydroxyphenylacetate	Amino Acid	Phenylalanine and Tyrosine Metabolism	1432	LC/MS Polar	858.6	151.04	614-75-5	11970	C05852	HMDB0000669	0.134411	0.753519	pink
2-hydroxystearate	Lipid	Fatty Acid, Monohydroxy	17945	LC/MS Neg	5695	299.259	629-22-1	69417		HMDB0062549	0.086273	0.582534	brown
2-linoleoylglycerol (18:2)	Lipid	Monoacylglycerol	32506	LC/MS Neg	6250	279.233		5365676		HMDB0011538	0.138339	0.753519	greenyellow
2-linoleoyl-GPC* (18:2)*	Lipid	Lysolipid	35257	LC/MS Neg	6013.2	594.341					-0.0369723	0.867608	grey
2-linoleoyl-GPE* (18:2)*	Lipid	Lysolipid	36593	LC/MS Neg	5813	476.278					-0.118019	0.751128	tan
2-methylbutyroylcarnitine (C5)	Amino Acid	Leucine, Isoleucine and Valine Metabolism	45095	LC/MS Pos Early	3035	246.17	31023-25-3	6426901		HMDB0000378	0.0806673	0.788578	brown
2-methylcitrate/homocitrate	Energy	TCA Cycle	52282	LC/MS Neg	575	205.035					0.124139	0.346357	brown
2-myristoyl-GPC* (14:0)*	Lipid	Lysolipid	35626	LC/MS Pos Late	1399	468.308					0.0142664	0.930261	purple
2-oleoylglycerol (18:1)	Lipid	Monoacylglycerol	21232	LC/MS Neg	6500	281.249		5319879		HMDB0011537	0.244264	0.56057	yellow
2-oleoyl-GPC* (18:1)*	Lipid	Lysolipid	48259	LC/MS Neg	6150	596.357				HMDB0061701	-0.032729	0.874433	red
2-oleoyl-GPE* (18:1)*	Lipid	Lysolipid	45455	LC/MS Neg	6000	478.294					-0.111322	0.754715	green
2-oleoyl-GPI (18:1)*	Lipid	Lysolipid	37232	LC/MS Neg	5546	597.304					-0.0553418	0.867608	blue
2-oxoarginine*	Amino Acid	Urea cycle; Arginine and Proline Metabolism	55072	LC/MS Pos Early	1760	174.087	3715-10-04	558	C03771	HMDB0004225	0.0349849	0.916376	brown
2-palmitoleoylglycerol (16:1)*	Lipid	Monoacylglycerol	52432	LC/MS Neg	6016	253.217					0.0460703	0.887984	pink
2-palmitoleoyl-GPC* (16:1)*	Lipid	Lysolipid	47118	LC/MS Neg	5720	568.326					-0.0673823	0.874433	yellow
2-palmitoyl-GPC* (16:0)*	Lipid	Lysolipid	35253	LC/MS Neg	6215	570.341				HMDB0061702	-0.00685764	0.929726	yellow
2-palmitoyl-GPE* (16:0)*	Lipid	Lysolipid	45452	LC/MS Neg	5919	452.278					0.0365196	0.887984	yellow
2-stearoyl-GPE (18:0)*	Lipid	Lysolipid	41220	LC/MS Neg	6350	480.31		53480667		HMDB0011129	0.132182	0.56057	red
2-stearoyl-GPI (18:0)*	Lipid	Lysolipid	39223	LC/MS Neg	5728	599.32					0.0871053	0.788578	green
3-(3-hydroxyphenyl)propionate	Amino Acid	Phenylalanine and Tyrosine Metabolism	35635	LC/MS Neg	1980	165.056	621-54-5	91	C11457	HMDB0000375	-0.389683	0.56057	grey
3-(3-hydroxyphenyl)propionate sulfate	Amino Acid	Phenylalanine and Tyrosine Metabolism	45415	LC/MS Neg	1294	245.012					-0.129704	0.857339	grey
3-(4-hydroxyphenyl)lactate (HPLA)	Amino Acid	Phenylalanine and Tyrosine Metabolism	32197	LC/MS Neg	1379	181.051	306-23-0	9378	C03672	HMDB0000755	0.108814	0.713872	purple
3-aminoisobutyrate	Nucleotide	Pyrimidine Metabolism, Thymine containing	1566	LC/MS Pos Early	2215	104.071	144-90-1	64956	C05145	HMDB0003911	-0.00235908	0.946721	blue
3beta,7alpha-dihydroxy-5-cholestenoate	Lipid	Sterol	36803	LC/MS Neg	5275	431.317	115538-84-6	3081084	C17335	HMDB0012454	-0.175899	0.582534	brown
3beta-hydroxy-5-cholestenoate	Lipid	Sterol	54805	LC/MS Neg	5398	415.322	6561-58-6	53481407	C17333	HMDB0012453	-0.116094	0.753519	tan
3b-hydroxy-5-cholenoic acid	Lipid	Secondary Bile Acid Metabolism	43507	LC/MS Neg	5205	373.275	5255-17-4	92997		HMDB0000308	-0.0788907	0.84262	grey
3-carboxy-4-methyl-5-propyl-2-furanpropanoate (CMPF)	Lipid	Fatty Acid, Dicarboxylate	31787	LC/MS Neg	2840	239.093	86879-39-2	123979		HMDB0061112	0.536111	0.56057	magenta
3-hydroxy-2-ethylpropionate	Amino Acid	Leucine, Isoleucine and Valine Metabolism	32397	LC/MS Polar	1443.3	117.056	4374-62-3	188979		HMDB0000396	-0.0202786	0.924948	magenta
3-hydroxy-3-methylglutarate	Lipid	Mevalote Metabolism	531	LC/MS Polar	2700	161.046	503-49-1	1662	C03761	HMDB0000355	-0.0244304	0.911942	tan
3-hydroxybutyrate (BHBA)	Lipid	Ketone Bodies	542	LC/MS Polar	1443.3	103.04	300-85-6	441	C01089	HMDB0000357	0.11742	0.889849	brown
3-hydroxybutyrylcarnitine (1)	Lipid	Fatty Acid Metabolism(Acyl Carnitine)	43264	LC/MS Pos Early	2400	248.149		53481699		HMDB0013127	0.159487	0.809047	purple
3-hydroxybutyrylcarnitine (2)	Lipid	Fatty Acid Metabolism(Acyl Carnitine)	52984	LC/MS Pos Early	2340	248.149		53481699		HMDB0013127	0.0651559	0.880414	black
3-hydroxydecanoate	Lipid	Fatty Acid, Monohydroxy	22053	LC/MS Neg	4634.7	187.134	14292-26-3	26612		HMDB0002203	0.0111809	0.943715	grey
3-hydroxyhexanoate	Lipid	Fatty Acid, Monohydroxy	53230	LC/MS Neg	1725	131.071					0.0401601	0.895336	black
3-hydroxyisobutyrate	Amino Acid	Leucine, Isoleucine and Valine Metabolism	1549	LC/MS Polar	1619	103.04	2068-83-9	440873	C06001	HMDB0000023	0.141029	0.788578	green
3-hydroxylaurate	Lipid	Fatty Acid, Monohydroxy	32457	LC/MS Neg	5175	215.165	1883-13-2	94216		HMDB0000387	0.1112	0.880414	grey
3-hydroxyoctanoate	Lipid	Fatty Acid, Monohydroxy	22001	LC/MS Neg	3446	159.103	14292-27-4	26613		HMDB0001954	-0.02306	0.924948	green
3-hydroxysebacate	Lipid	Fatty Acid, Monohydroxy	31943	LC/MS Neg	1282	217.108	73141-46-5	3017884		HMDB0000350	-0.041739	0.924542	brown
3-indoxyl sulfate	Amino Acid	Tryptophan Metabolism	27672	LC/MS Neg	2222.2	212.002	487-94-5	10258		HMDB0000682	-0.027671	0.924948	blue
3-methoxytyrosine	Amino Acid	Phenylalanine and Tyrosine Metabolism	12017	LC/MS Pos Early	2555	212.092	7636-26-2	1670		HMDB0001434	0.171318	0.346357	black
3-methyl-2-oxobutyrate	Amino Acid	Leucine, Isoleucine and Valine Metabolism	44526	LC/MS Polar	911	115.04	759-05-7	49	C00141	HMDB0000019	0.0312801	0.877743	red
3-methyl-2-oxovalerate	Amino Acid	Leucine, Isoleucine and Valine Metabolism	15676	LC/MS Neg	2064.2	129.056	1460-34-0	47	C03465	HMDB0000491	-0.0374277	0.874433	grey
3-methyladipate	Lipid	Fatty Acid, Dicarboxylate	36749	LC/MS Polar	2865	159.066	3058-01-03	6999745		HMDB0000555	0.0302324	0.924542	pink
3-methylcytidine	Nucleotide	Pyrimidine Metabolism, Cytidine containing	35132	LC/MS Pos Early	2176	258.108					0.0621345	0.799905	brown
3-methylglutaconate	Amino Acid	Leucine, Isoleucine and Valine Metabolism	38667	LC/MS Polar	2579.6	143.035	5746-90-7	1551553		HMDB0000522	0.232788	0.527853	blue
3-methylglutarylcarnitine (2)	Amino Acid	Leucine, Isoleucine and Valine Metabolism	46548	LC/MS Pos Early	2675	290.16	102673-95-0	128145		HMDB0000552	0.167113	0.754715	black
3-methylhistidine	Amino Acid	Histidine Metabolism	15677	LC/MS Neg	906.3	168.078	368-16-1	64969	C01152	HMDB0000479	0.296069	0.788578	blue
3-phenylpropionate (hydrocinnamate)	Amino Acid	Phenylalanine and Tyrosine Metabolism	15749	LC/MS Neg	2860	149.061	501-52-0	107	C05629	HMDB0000764	-0.470412	0.527853	grey
3-sulfo-L-alanine	Amino Acid	Alanine and Aspartate Metabolism	47089	LC/MS Polar	2890	167.997	498-40-8	25701	C00506	HMDB0002757	0.00415876	0.943715	blue
3-ureidopropionate	Nucleotide	Pyrimidine Metabolism, Uracil containing	3155	LC/MS Pos Early	875	133.061	462-88-4	111	C02642	HMDB0000026	0.117528	0.753519	grey
4-acetamidobutanoate	Amino Acid	Polyamine Metabolism	1558	LC/MS Pos Early	1350	146.081	3025-96-5	18189	C02946	HMDB0003681	0.165125	0.357343	pink
4-cholesten-3-one	Lipid	Sterol	38125	LC/MS Pos Late	2520	385.346	601-57-0	91477	C00599	HMDB0000921	0.0519888	0.867608	grey
4-guanidinobutanoate	Amino Acid	Guanidino and Acetamido Metabolism	15681	LC/MS Pos Early	2320	146.092	463-00-3	500	C01035	HMDB0003464	-0.00468265	0.943887	brown
4-hydroxyphenylacetate	Amino Acid	Phenylalanine and Tyrosine Metabolism	541	LC/MS Neg	1361.1	151.04	156-38-7	127	C00642	HMDB0000020	-0.0311991	0.924542	blue
4-hydroxyphenylacetylglutamine	Peptide	Acetylated Peptides	55017	LC/MS Neg	1650	279.099					0.209206	0.658703	green
4-hydroxyphenylpyruvate	Amino Acid	Phenylalanine and Tyrosine Metabolism	1669	LC/MS Neg	1690.1	179.035	156-39-8	979	C01179	HMDB0000707	-0.115806	0.788578	blue
4-imidazoleacetate	Amino Acid	Histidine Metabolism	32349	LC/MS Pos Early	2055	127.05	645-65-8	96215	C02835	HMDB0002024	-0.0654999	0.822127	grey
4-methyl-2-oxopentanoate	Amino Acid	Leucine, Isoleucine and Valine Metabolism	22116	LC/MS Neg	2170	129.056	816-66-0	70	C00233	HMDB0000695	0.00288657	0.943887	red
5-(galactosylhydroxy)-L-lysine	Amino Acid	Lysine Metabolism	43582	LC/MS Pos Early	2755	325.161	32448-36-5	22833535	C05547	HMDB0000600	0.00332613	0.943715	grey
5,6-dihydrothymine	Nucleotide	Pyrimidine Metabolism, Thymine containing	1418	LC/MS Pos Early	1280	129.066	696-04-8	93556	C00906	HMDB0000079	0.0993606	0.603552	grey
5alpha-androstan-3alpha,17beta-diol disulfate	Lipid	Steroid	37184	LC/MS Neg	4275	225.07				HMDB0094682	0.111477	0.689433	black
5alpha-androstan-3alpha,17beta-diol monosulfate (1)	Lipid	Steroid	37186	LC/MS Neg	4925	371.19					0.175243	0.788578	grey
5alpha-androstan-3alpha,17beta-diol monosulfate (2)	Lipid	Steroid	37185	LC/MS Neg	5080	371.19					0.0252788	0.874433	green
5alpha-androstan-3beta,17alpha-diol disulfate	Lipid	Steroid	37187	LC/MS Neg	4215	225.07					0.166804	0.859279	grey
5alpha-androstan-3beta,17beta-diol disulfate	Lipid	Steroid	37190	LC/MS Neg	3880	225.07	571-20-0	242332	C12525	HMDB0000493	0.278562	0.754715	brown
5alpha-androstan-3beta,17beta-diol monosulfate (2)	Lipid	Steroid	37192	LC/MS Neg	4685	371.19					0.0901334	0.873673	greenyellow
5alpha-pregnan-3(alpha or beta),20beta-diol disulfate	Lipid	Steroid	46172	LC/MS Neg	4310	239.085					0.208018	0.799905	grey
5alpha-pregnan-3beta,20alpha-diol disulfate	Lipid	Steroid	37198	LC/MS Neg	3962	239.085				HMDB0094650	0.467126	0.658703	green
5alpha-pregnan-3beta,20alpha-diol monosulfate (2)	Lipid	Steroid	37200	LC/MS Neg	5060	399.221					0.253807	0.788578	tan
5alpha-pregnan-3beta,20beta-diol monosulfate (1)	Lipid	Steroid	37196	LC/MS Neg	5180	399.221					0.305993	0.757128	green
5-bromotryptophan	Amino Acid	Phenylalanine and Tyrosine Metabolism	53242	LC/MS Neg	3525	280.993					-0.0109975	0.929726	magenta
5-dodecenoate (12:1n7)	Lipid	Medium Chain Fatty Acid	33968	LC/MS Neg	5224	197.155	2430-94-6	5312378		HMDB0000529	0.0521298	0.924948	tan
5-hydroxyhexanoate	Lipid	Fatty Acid, Monohydroxy	31938	LC/MS Neg	1267	131.071	44843-89-2	170748		HMDB0000525	-0.0888114	0.838149	black
5-hydroxyindole sulfate	Amino Acid	Tryptophan Metabolism	52914	LC/MS Neg	1928	212.002					0.0205348	0.924948	black
5-hydroxyindoleacetate	Amino Acid	Tryptophan Metabolism	437	LC/MS Neg	1510.2	190.051	54-16-0	1826	C05635	HMDB0000763	0.18972	0.56057	red
5-hydroxylysine	Amino Acid	Lysine Metabolism	15685	LC/MS Pos Early	2790	163.108	1190-94-9	3032849	C16741	HMDB0000450	-0.123579	0.753519	green
5-methylthioadenosine (MTA)	Amino Acid	Polyamine Metabolism	1419	LC/MS Pos Early	2752	298.097	2457-80-9	439176	C00170	HMDB0001173	0.0548305	0.788578	grey
5-methyluridine (ribothymidine)	Nucleotide	Pyrimidine Metabolism, Uracil containing	35136	LC/MS Neg	1778.1	257.078	1463-10-1	445408		HMDB0000884	-0.0604964	0.8087	grey
5-oxoproline	Amino Acid	Glutathione Metabolism	1494	LC/MS Neg	738.5	128.035	98-79-3	7405	C01879	HMDB0000267	0.000666276	0.946721	grey
6-oxopiperidine-2-carboxylate	Amino Acid	Lysine Metabolism	43231	LC/MS Neg	964.5	142.051				HMDB0061705	-0.182102	0.665264	blue
7-HOCA	Lipid	Sterol	36776	LC/MS Neg	5288.1	429.301	115538-85-7	3081085	C17337	HMDB0012458	0.029969	0.883929	yellow
7-methylguanine	Nucleotide	Purine Metabolism, Guanine containing	35114	LC/MS Pos Early	2175	166.072	578-76-7	11361	C02242	HMDB0000897	0.0814685	0.588816	grey
9,10-DiHOME	Lipid	Fatty Acid, Dihydroxy	38399	LC/MS Neg	5180	313.238		9966640	C14828	HMDB0004704	-0.188577	0.753519	brown
9-hydroxystearate	Lipid	Fatty Acid, Monohydroxy	47120	LC/MS Neg	5384	299.259	3384-24-5			HMDB0061661	-0.040708	0.924948	brown
acetylcarnitine (C2)	Lipid	Fatty Acid Metabolism(Acyl Carnitine)	32198	LC/MS Pos Early	2282	204.123	3040-38-8	7045767		HMDB0000201	0.0137254	0.930261	tan
acisoga	Amino Acid	Polyamine Metabolism	43258	LC/MS Neg	2297	183.114	106692-36-8	129397		HMDB0061384	0.0496057	0.874433	grey
aconitate [cis or trans]	Energy	TCA Cycle	46173	LC/MS Neg	580	173.009	585-84-2	643757	C00417	HMDB0000072	-0.0168348	0.924542	yellow
adenine	Nucleotide	Purine Metabolism, Adenine containing	554	LC/MS Pos Early	2221	136.062	73-24-5	190	C00147	HMDB0000034	0.116723	0.346357	yellow
adenosine	Nucleotide	Purine Metabolism, Adenine containing	555	LC/MS Neg	2075.4	134.047	58-61-7	60961	C00212	HMDB0000050	0.0568391	0.810221	brown
adipate	Lipid	Fatty Acid, Dicarboxylate	21134	LC/MS Polar	3000	145.051	124-04-9	196	C06104	HMDB0000448	0.169877	0.658703	brown
adipoylcarnitine (C6-DC)	Lipid	Fatty Acid Metabolism(Acyl Carnitine)	52988	LC/MS Pos Early	2558	290.16				HMDB0061677	0.237117	0.416085	grey
adrenate (22:4n6)	Lipid	Polyunsaturated Fatty Acid (n3 and n6)	32980	LC/MS Neg	5678	331.264	28874-58-0	5497181	C16527	HMDB0002226	0.015683	0.937319	grey
adrenoylcarnitine (C22:4)*	Lipid	Fatty Acid Metabolism(Acyl Carnitine)	57528	LC/MS Pos Late	1415	476.373					0.0848603	0.753519	pink
ADSGEGDFXAEGGGVR*	Peptide	Fibrinogen Cleavage Peptide	33084	LC/MS Pos Early	3350	768.85					0.048083	0.887984	tan
alanine	Amino Acid	Alanine and Aspartate Metabolism	1126	LC/MS Pos Early	1700	90.055	56-41-7	5950	C00041	HMDB0000161	-0.0425823	0.867608	grey
allantoin	Nucleotide	Purine Metabolism, (Hypo)Xanthine/Inosine containing	1107	LC/MS Polar	1672	157.037	97-59-6	204	C01551	HMDB0000462	-0.0434357	0.877333	red
alpha-glutamylalanine	Peptide	Dipeptide	41369	LC/MS Pos Early	2159	219.098	21064-18-6	6992506		HMDB0003764	0.0187702	0.924542	blue
alpha-glutamylglycine	Peptide	Dipeptide	41530	LC/MS Pos Early	1971	205.082	13716-89-7	6427052		HMDB0028819	0.0832905	0.884416	green
alpha-glutamylthreonine	Peptide	Dipeptide	38147	LC/MS Pos Early	2062	249.108	6875-80-5	6998031		HMDB0028829	0.100303	0.676983	yellow
alpha-glutamyltyrosine	Peptide	Dipeptide	40033	LC/MS Pos Early	2613	311.124	3422-39-7	515717		HMDB0028831	-0.0137551	0.940238	blue
alpha-hydroxycaproate	Lipid	Fatty Acid, Monohydroxy	37073	LC/MS Neg	1920	131.071	6064-63-7	99824		HMDB0001624	-0.138709	0.527853	green
alpha-hydroxyisocaproate	Amino Acid	Leucine, Isoleucine and Valine Metabolism	22132	LC/MS Neg	1840	131.071	13748-90-8	83697		HMDB0000746	-0.0254831	0.910384	brown
alpha-hydroxyisovalerate	Amino Acid	Leucine, Isoleucine and Valine Metabolism	33937	LC/MS Neg	1126	117.056	4026-18-0	99823		HMDB0000407	0.0125715	0.937319	grey
alpha-ketobutyrate	Amino Acid	Methionine, Cysteine, SAM and Taurine Metabolism	4968	LC/MS Polar	940	101.024	600-18-0	58	C00109	HMDB0000005	-0.0310064	0.924948	magenta
alpha-ketoglutarate	Energy	TCA Cycle	528	LC/MS Polar	2700	145.014	328-50-7	51	C00026	HMDB0000208	-0.0658225	0.810221	brown
alpha-tocopherol	Cofactors and Vitamins	Tocopherol Metabolism	1561	LC/MS Pos Late	2522	430.378	59-02-9	14985	C02477	HMDB0001893	0.08166	0.753519	grey
AMP	Nucleotide	Purine Metabolism, Adenine containing	32342	LC/MS Pos Early	1013	348.07	61-19-8	6083	C00020	HMDB0000045	0.04856	0.867608	greenyellow
andro steroid monosulfate (1)*	Lipid	Steroid	32827	LC/MS Neg	3871	383.153	2479-86-9	159663		HMDB0002759	0.0528687	0.918261	red
androstenediol (3alpha, 17alpha) monsulfate (2)	Lipid	Steroid	37207	LC/MS Neg	4712	369.174					0.0748694	0.879708	grey
androstenediol (3alpha, 17alpha) monsulfate (3)	Lipid	Steroid	37209	LC/MS Neg	5180	369.174					0.170664	0.788578	black
androstenediol (3beta,17beta) disulfate (1)	Lipid	Steroid	37202	LC/MS Neg	3740	224.062	521-17-5	10634	C04295	HMDB0003818	0.0351987	0.928463	red
androstenediol (3beta,17beta) disulfate (2)	Lipid	Steroid	37203	LC/MS Neg	4065	224.062	521-17-5	10634	C04295	HMDB0003818	0.0996025	0.879708	grey
androstenediol (3beta,17beta) monosulfate (1)	Lipid	Steroid	37211	LC/MS Neg	4500	369.174	521-17-5	10634	C04295	HMDB0003818	-0.229254	0.759857	brown
androstenediol (3beta,17beta) monosulfate (2)	Lipid	Steroid	37210	LC/MS Neg	4500	369.174					0.0234235	0.930261	grey
androsterone sulfate	Lipid	Steroid	31591	LC/MS Neg	5022	369.174	2479-86-9	159663		HMDB0002759	-0.0563858	0.924948	green
arabinose	Carbohydrate	Pentose Metabolism	575	LC/MS Polar	1804.5	195.051	5328-37-0	439195	C00259	HMDB0000646	-0.140741	0.735863	grey
arabitol/xylitol	Carbohydrate	Pentose Metabolism	48885	LC/MS Polar	1932.4	151.061					0.0180218	0.924948	yellow
arabonate/xylonate	Carbohydrate	Pentose Metabolism	48255	LC/MS Polar	2664.6	165.041					-0.0949367	0.757128	black
arachidate (20:0)	Lipid	Long Chain Fatty Acid	1118	LC/MS Neg	6295	311.296	506-30-9	10467	C06425	HMDB0002212	-0.0359792	0.874433	yellow
arachidonate (20:4n6)	Lipid	Polyunsaturated Fatty Acid (n3 and n6)	1110	LC/MS Neg	5535	303.233	506-32-1	444899	C00219	HMDB0001043	0.0171723	0.924948	purple
arachidonoylcarnitine (C20:4)	Lipid	Fatty Acid Metabolism(Acyl Carnitine)	57518	LC/MS Pos Late	1353	448.342					0.122064	0.658703	purple
arachidonoylcholine	Lipid	Phospholipid Metabolism	53261	LC/MS Pos Late	1390	390.337					0.240081	0.753519	purple
arachidoylcarnitine (C20)*	Lipid	Fatty Acid Metabolism(Acyl Carnitine)	57513	LC/MS Pos Late	1512	456.405		53477833		HMDB0006460	-0.0596544	0.874433	black
argininate*	Amino Acid	Urea cycle; Arginine and Proline Metabolism	57461	LC/MS Pos Early	2150	176.103	157-07-3	160437		HMDB0003148	0.194379	0.658703	brown
arginine	Amino Acid	Urea cycle; Arginine and Proline Metabolism	1638	LC/MS Pos Early	2825	175.119	74-79-3	6322	C00062	HMDB0000517	0.0198971	0.887984	yellow
argininosuccinate	Amino Acid	Urea cycle; Arginine and Proline Metabolism	15497	LC/MS Pos Early	2745	291.13	2387-71-5	16950	C03406	HMDB0000052	0.00365825	0.943887	blue
asparagine	Amino Acid	Alanine and Aspartate Metabolism	512	LC/MS Pos Early	1225	133.061	70-47-3	6267	C00152	HMDB0000168	-0.102525	0.40579	green
aspartate	Amino Acid	Alanine and Aspartate Metabolism	443	LC/MS Pos Early	1165	134.045	56-84-8	5960	C00049	HMDB0000191	0.0979614	0.658703	yellow
aspartylphenylalanine	Peptide	Dipeptide	22175	LC/MS Pos Early	3040	281.113	13433-09-5	93078		HMDB0000706	0.0915116	0.874433	green
azelate (nonanedioate; C9)	Lipid	Fatty Acid, Dicarboxylate	18362	LC/MS Neg	1276	187.098	123-99-9	2266	C08261	HMDB0000784	0.150807	0.753519	blue
behenate (22:0)*	Lipid	Long Chain Fatty Acid	12125	LC/MS Neg	6745	339.327	112-85-6	8215	C08281	HMDB0000944	0.00109973	0.946745	pink
behenoyl dihydrosphingomyelin (d18:0/22:0)*	Lipid	Sphingolipid Metabolism	57331	LC/MS Pos Late	3150	789.684		44260132	C00550	HMDB0012091	0.0783068	0.857339	pink
behenoyl sphingomyelin (d18:1/22:0)*	Lipid	Sphingolipid Metabolism	48492	LC/MS Pos Late	3083	787.669		44260125	C00550	HMDB0012103	0.0261632	0.877333	pink
behenoylcarnitine (C22)*	Lipid	Fatty Acid Metabolism(Acyl Carnitine)	57514	LC/MS Pos Late	1561	484.436					-0.0543617	0.879708	yellow
beta-alanine	Nucleotide	Pyrimidine Metabolism, Uracil containing	55	LC/MS Pos Early	1905	90.055	107-95-9	239	C00099	HMDB0000056	0.0831427	0.788578	magenta
beta-citrylglutamate	Amino Acid	Glutamate Metabolism	54923	LC/MS Neg	530	320.062					-0.0481104	0.84262	green
beta-hydroxyisovalerate	Amino Acid	Leucine, Isoleucine and Valine Metabolism	12129	LC/MS Neg	1027	117.056	625-08-1	69362		HMDB0000754	0.215639	0.346357	grey
betaine	Amino Acid	Glycine, Serine and Threonine Metabolism	3141	LC/MS Pos Early	1064	118.086	107-43-7	247	C00719	HMDB0000043	0.0357487	0.874433	magenta
beta-sitosterol	Lipid	Sterol	27414	LC/MS Pos Late	3054	397.383	83-46-5	222284	C01753	HMDB0000852	0.0178204	0.930395	tan
bilirubin	Cofactors and Vitamins	Hemoglobin and Porphyrin Metabolism	43807	LC/MS Pos Late	1840	585.271	635-65-4	21252250		HMDB0000054	0.157509	0.658703	magenta
bilirubin (E,E)*	Cofactors and Vitamins	Hemoglobin and Porphyrin Metabolism	32586	LC/MS Pos Late	1045	585.271	114-25-0	5353439	C00500	HMDB0001008	0.109665	0.799739	magenta
bilirubin (E,Z or Z,E)*	Cofactors and Vitamins	Hemoglobin and Porphyrin Metabolism	47886	LC/MS Pos Late	1270	585.271					0.108334	0.754715	magenta
biliverdin	Cofactors and Vitamins	Hemoglobin and Porphyrin Metabolism	2137	LC/MS Pos Late	1016	583.255	114-25-0	5353439	C00500	HMDB0001008	0.134514	0.757128	magenta
bradykinin, des-arg(9)	Peptide	Polypeptide	34420	LC/MS Pos Late	810	452.737	58-82-2	439201	C00306	HMDB0004246	0.0330616	0.924948	brown
butyrylcarnitine (C4)	Lipid	Fatty Acid Metabolism (also BCAA Metabolism)	32412	LC/MS Pos Early	2860	232.154	25576-40-3	213144	C02862	HMDB0002013	-0.0111838	0.937319	blue
campesterol	Lipid	Sterol	33997	LC/MS Pos Late	2873	383.367	474-62-4	173183	C01789	HMDB0002869	0.00277465	0.946721	green
caprate (10:0)	Lipid	Medium Chain Fatty Acid	1642	LC/MS Neg	5090.7	171.139	334-48-5	2969	C01571	HMDB0000511	-0.13108	0.848267	red
caproate (6:0)	Lipid	Medium Chain Fatty Acid	32489	LC/MS Neg	2713.7	115.076	142-62-1	8892	C01585	HMDB0000535	0.0527064	0.867608	grey
caprylate (8:0)	Lipid	Medium Chain Fatty Acid	32492	LC/MS Neg	4362	143.108	124-07-2	379	C06423	HMDB0000482	-0.259069	0.658703	yellow
carnitine	Lipid	Carnitine Metabolism	15500	LC/MS Pos Early	1978	162.113	541-15-1	2724480	C00318	HMDB0000062	-0.0558833	0.753519	tan
catechol glucuronide	Amino Acid	Phenylalanine and Tyrosine Metabolism	53243	LC/MS Neg	1742	285.062					-0.0978049	0.823103	green
ceramide (d18:1/17:0, d17:1/18:0)*	Lipid	Ceramides	57434	LC/MS Pos Late	3055	552.535					0.250434	0.490338	magenta
ceramide (d18:1/20:0, d16:1/22:0, d20:1/18:0)*	Lipid	Ceramides	57440	LC/MS Pos Late	3920	594.582					0.175761	0.490338	yellow
ceramide (d18:2/24:1, d18:1/24:2)*	Lipid	Ceramides	57443	LC/MS Pos Late	3858	646.613					0.215437	0.199406	brown
cerotoylcarnitine (C26)*	Lipid	Fatty Acid Metabolism(Acyl Carnitine)	57516	LC/MS Pos Late	1649	540.499		53477828		HMDB0006347	0.140813	0.660921	yellow
C-glycosyltryptophan	Amino Acid	Tryptophan Metabolism	48782	LC/MS Neg	1777	365.135					0.183861	0.199406	black
chenodeoxycholate	Lipid	Primary Bile Acid Metabolism	1563	LC/MS Neg	5264	391.285	474-25-9	10133	C02528	HMDB0000518	-0.198495	0.799905	grey
chiro-inositol	Lipid	Inositol Metabolism	37112	LC/MS Polar	3191.2	225.062	551-72-4			HMDB0034220	-0.0198486	0.937319	red
cholate	Lipid	Primary Bile Acid Metabolism	22842	LC/MS Neg	5165	407.28	2464-18-8	221493	C00695	HMDB0000505	-0.312272	0.783393	greenyellow
cholesterol	Lipid	Sterol	63	LC/MS Pos Late	2707	369.352	57-88-5	5997	C00187	HMDB0000067	0.0456785	0.809047	green
choline	Lipid	Phospholipid Metabolism	15506	LC/MS Pos Early	1961	104.107	62-49-7	305	C00114	HMDB0000097	0.108883	0.346357	magenta
cis-4-decenoylcarnitine (C10:1)	Lipid	Fatty Acid Metabolism(Acyl Carnitine)	38178	LC/MS Pos Late	1057	314.233					0.145143	0.788578	blue
citraconate/glutaconate	Energy	TCA Cycle	47076	LC/MS Polar	2600	129.019					-0.410138	0.490338	magenta
citrate	Energy	TCA Cycle	1564	LC/MS Neg	582	191.02	77-92-9	311	C00158	HMDB0000094	-0.0111095	0.924948	greenyellow
citrulline	Amino Acid	Urea cycle; Arginine and Proline Metabolism	2132	LC/MS Pos Early	1520	176.103	372-75-8	9750	C00327	HMDB0000904	-0.0312064	0.884416	black
corticosterone	Lipid	Steroid	5983	LC/MS Neg	5040	345.207	50-22-6	5753	C02140	HMDB0001547	0.0372218	0.893178	grey
cortisol	Lipid	Steroid	1712	LC/MS Neg	4713.2	361.202	50-23-7	5754	C00735	HMDB0000063	-0.0597712	0.874433	red
cortisone	Lipid	Steroid	1769	LC/MS Neg	4572.5	359.186	53-06-5	222786	C00762	HMDB0002802	-0.0647126	0.859168	blue
creatine	Amino Acid	Creatine Metabolism	27718	LC/MS Pos Early	1947	132.077	57-00-1	586	C00300	HMDB0000064	-0.0456251	0.887984	red
creatinine	Amino Acid	Creatine Metabolism	513	LC/MS Pos Early	2055	114.066	60-27-5	588	C00791	HMDB0000562	0.0664335	0.56561	green
cyclo(L-phe-L-pro)	Peptide	Dipeptide	44875	LC/MS Pos Early	2766	245.129					0.00960194	0.943715	grey
cyclo(met-pro)	Peptide	Dipeptide	52350	LC/MS Pos Early	2190	229.101					0.0298216	0.911942	brown
cyclo(pro-val)	Peptide	Dipeptide	49795	LC/MS Pos Early	2098	197.129					-0.399981	0.357343	purple
cys-gly, oxidized	Amino Acid	Glutathione Metabolism	18368	LC/MS Pos Early	2947	355.074					0.139155	0.660108	grey
cystathionine	Amino Acid	Methionine, Cysteine, SAM and Taurine Metabolism	15705	LC/MS Pos Early	2270	223.075	56-88-2	439258	C02291	HMDB0000099	0.136609	0.830863	red
cysteine	Amino Acid	Methionine, Cysteine, SAM and Taurine Metabolism	1868	LC/MS Pos Early	1488	122.027	52-90-4	5862	C00097	HMDB0000574	0.0220867	0.916376	black
cysteine s-sulfate	Amino Acid	Methionine, Cysteine, SAM and Taurine Metabolism	22176	LC/MS Pos Early	565	201.984	1637-71-4	115015	C05824	HMDB0000731	-0.138207	0.346357	red
cysteine sulfinic acid	Amino Acid	Methionine, Cysteine, SAM and Taurine Metabolism	37443	LC/MS Pos Early	597	154.017	1115-65-7	439270	C00606	HMDB0000996	-0.0121154	0.929726	pink
cysteine-glutathione disulfide	Amino Acid	Glutathione Metabolism	35159	LC/MS Pos Early	2465	427.095	13081-14-6	53477713		HMDB0000656	-0.17736	0.753519	brown
cysteinylglycine	Amino Acid	Glutathione Metabolism	35637	LC/MS Pos Early	2132	179.048	19246-18-5	439498	C01419	HMDB0000078	0.134255	0.754715	grey
cystine	Amino Acid	Methionine, Cysteine, SAM and Taurine Metabolism	56	LC/MS Pos Early	2000	241.031	56-89-3	67678	C00491	HMDB0000192	0.0581796	0.689433	blue
cytidine	Nucleotide	Pyrimidine Metabolism, Cytidine containing	514	LC/MS Neg	1325	242.078	65-46-3	6253	C02961	HMDB0000089	-0.0635539	0.859279	purple
decanoylcarnitine (C10)	Lipid	Fatty Acid Metabolism(Acyl Carnitine)	33941	LC/MS Pos Late	1130	316.248	1492-27-9	10245190		HMDB0000651	0.20433	0.788578	yellow
dehydroisoandrosterone sulfate (DHEA-S)	Lipid	Steroid	32425	LC/MS Neg	4745	367.159	651-48-9	12594	C04555	HMDB0001032	-0.14791	0.831615	magenta
deoxycarnitine	Lipid	Carnitine Metabolism	36747	LC/MS Pos Early	2052	146.118	407-64-7	134	C01181	HMDB0001161	-0.0265286	0.878743	black
deoxycholate	Lipid	Secondary Bile Acid Metabolism	1114	LC/MS Neg	5294	391.285	83-44-3	222528	C04483	HMDB0000626	-0.403934	0.490338	purple
diacylglycerol (14:0/18:1, 16:0/16:1) [1]*	Lipid	Diacylglycerol	54953	LC/MS Pos Late	3057	584.525					0.202128	0.658703	green
diacylglycerol (14:0/18:1, 16:0/16:1) [2]*	Lipid	Diacylglycerol	54954	LC/MS Pos Late	3183	584.525					0.351442	0.346357	red
diacylglycerol (16:1/18:2 [2], 16:0/18:3 [1])*	Lipid	Diacylglycerol	54966	LC/MS Pos Late	2733	608.525					0.536315	0.253605	brown
dihomolinoleate (20:2n6)	Lipid	Polyunsaturated Fatty Acid (n3 and n6)	17805	LC/MS Neg	5730	307.264	2091-39-6	6439848	C16525	HMDB0005060	0.0680133	0.880414	red
dihomolinolenate (20:3n3 or 3n6)	Lipid	Polyunsaturated Fatty Acid (n3 and n6)	35718	LC/MS Neg	5596	305.249	1783-84-2	5280581	C03242	HMDB0002925	0.0535125	0.874433	grey
dihomo-linolenoylcarnitine (20:3n3 or 6)*	Lipid	Fatty Acid Metabolism(Acyl Carnitine)	57521	LC/MS Pos Late	1392	450.358					0.0527614	0.877333	yellow
dihomo-linolenoyl-choline	Lipid	Phospholipid Metabolism	53262	LC/MS Pos Late	1424	392.352					0.193962	0.788578	purple
dihomo-linoleoylcarnitine (C20:2)*	Lipid	Fatty Acid Metabolism(Acyl Carnitine)	57520	LC/MS Pos Late	1436	452.373					0.0688622	0.859279	purple
dimethylarginine (ADMA + SDMA)	Amino Acid	Urea cycle; Arginine and Proline Metabolism	36808	LC/MS Pos Early	2850	203.15	30315-93-6	123831	C03626	HMDB0001539	0.0560819	0.753519	black
dimethylglycine	Amino Acid	Glycine, Serine and Threonine Metabolism	5086	LC/MS Pos Early	1104	104.071	1118-68-9	673	C01026	HMDB0000092	0.0190939	0.924542	blue
docosadienoate (22:2n6)	Lipid	Polyunsaturated Fatty Acid (n3 and n6)	32415	LC/MS Neg	6034	335.296				HMDB0061714	0.0480779	0.897631	tan
docosadioate	Lipid	Fatty Acid, Dicarboxylate	39837	LC/MS Neg	5291.8	369.301					-0.0848922	0.860382	pink
docosahexaenoate (DHA; 22:6n3)	Lipid	Polyunsaturated Fatty Acid (n3 and n6)	44675	LC/MS Neg	5525	327.233	6217-54-5	445580	C06429	HMDB0002183	0.225231	0.530697	brown
docosahexaenoylcholine	Lipid	Phospholipid Metabolism	53263	LC/MS Pos Late	1378	414.337					0.454778	0.403659	pink
docosapentaenoate (DPA; 22:5n3)	Lipid	Polyunsaturated Fatty Acid (n3 and n6)	32504	LC/MS Neg	5571	329.249	25448-00-4	6441454		HMDB0001976	0.121539	0.797707	brown
docosapentaenoate (n6 DPA; 22:5n6)	Lipid	Polyunsaturated Fatty Acid (n3 and n6)	37478	LC/MS Neg	5624.5	329.249	25448-00-4	6441454		HMDB0001976	0.0585687	0.879708	grey
docosapentaenoylcarnitine (C22:5n3)*	Lipid	Fatty Acid Metabolism(Acyl Carnitine)	57529	LC/MS Pos Late	1387	474.358					0.171067	0.658703	magenta
docosatrienoate (22:3n3)	Lipid	Polyunsaturated Fatty Acid (n3 and n6)	32417	LC/MS Neg	5823	333.28	28845-86-5	5312557		HMDB0002823	0.0142389	0.940937	tan
docosatrienoate (22:3n6)*	Lipid	Polyunsaturated Fatty Acid (n3 and n6)	57467	LC/MS Neg	5850	333.28					0.0225183	0.924948	yellow
dodecanedioate (C12)	Lipid	Fatty Acid, Dicarboxylate	32388	LC/MS Neg	2990	229.144	693-23-2	12736	C02678	HMDB0000623	-0.244773	0.735863	grey
dopamine 3-O-sulfate	Amino Acid	Phenylalanine and Tyrosine Metabolism	48407	LC/MS Neg	1556.2	232.029	51317-41-0	122136	C13690	HMDB0006275	0.353508	0.346357	grey
dopamine 4-sulfate	Amino Acid	Phenylalanine and Tyrosine Metabolism	48406	LC/MS Neg	1511	232.029	38339-02-5	123932	C13691	HMDB0004148	0.2292	0.699308	grey
DSGEGDFXAEGGGVR*	Peptide	Fibrinogen Cleavage Peptide	31548	LC/MS Neg	2535	731.317					0.119935	0.759857	magenta
eicosanodioate	Lipid	Fatty Acid, Dicarboxylate	39831	LC/MS Neg	5200.9	341.27					-0.0977546	0.810221	green
eicosapentaenoate (EPA; 20:5n3)	Lipid	Polyunsaturated Fatty Acid (n3 and n6)	18467	LC/MS Neg	5450	301.217	10417-94-4	446284	C06428	HMDB0001999	0.114611	0.788578	grey
eicosapentaenoylcholine	Lipid	Phospholipid Metabolism	53258	LC/MS Pos Late	1343	388.321					0.32354	0.670325	brown
eicosenoate (20:1n9 or 1n11)	Lipid	Long Chain Fatty Acid	33587	LC/MS Neg	5950	309.28	26764-41-0	5282768	C16526	HMDB0002231	0.10177	0.874433	brown
eicosenoylcarnitine (C20:1)*	Lipid	Fatty Acid Metabolism(Acyl Carnitine)	57519	LC/MS Pos Late	1484	454.389					0.0973616	0.753519	pink
epiandrosterone sulfate	Lipid	Steroid	33973	LC/MS Neg	4855	369.174	481-29-8	11055399	C07635	HMDB0000365	0.0415683	0.924948	black
erucate (22:1n9)	Lipid	Long Chain Fatty Acid	1552	LC/MS Neg	6355.6	337.311	112-86-7	5281116	C08316	HMDB0002068	0.00789189	0.943715	black
erythronate*	Carbohydrate	Aminosugar Metabolism	42420	LC/MS Polar	2186	135.03	13752-84-6	2781043		HMDB0000613	0.0646365	0.753519	red
ethylmalonate	Amino Acid	Leucine, Isoleucine and Valine Metabolism	15765	LC/MS Polar	2785	131.035	601-75-2	11756		HMDB0000622	-0.0961439	0.788578	blue
etiocholanolone glucuronide	Lipid	Steroid	47112	LC/MS Neg	4915	465.249	3602-09-03	443078	C11136	HMDB0004484	0.10722	0.874433	brown
fructose	Carbohydrate	Fructose, Mannose and Galactose Metabolism	48195	LC/MS Polar	2022.2	225.062	57-48-7	5984	C10906	HMDB0062538	0.0165177	0.924948	greenyellow
fumarate	Energy	TCA Cycle	1643	LC/MS Polar	3084	115.004	110-17-8	444972	C00122	HMDB0000134	-0.0548844	0.84262	grey
galactonate	Carbohydrate	Fructose, Mannose and Galactose Metabolism	27719	LC/MS Polar	3085	195.051	13382-27-9	128869	C00880	HMDB0000565	-0.370095	0.658703	greenyellow
gamma-carboxyglutamate	Amino Acid	Glutamate Metabolism	38754	LC/MS Pos Early	903	192.05	53445-96-8	40772		HMDB0041900	0.148915	0.346357	purple
gamma-CEHC	Cofactors and Vitamins	Tocopherol Metabolism	44876	LC/MS Neg	3843	263.129	178167-75-4	133098		HMDB0001931	0.149122	0.759857	blue
gamma-CEHC glucuronide*	Cofactors and Vitamins	Tocopherol Metabolism	42381	LC/MS Neg	2500	439.161					-0.0672579	0.753519	greenyellow
gamma-glutamyl-2-aminobutyrate	Peptide	Gamma-glutamyl Amino Acid	37092	LC/MS Pos Early	2380	233.113					-0.101104	0.783393	red
gamma-glutamylalanine	Peptide	Gamma-glutamyl Amino Acid	37063	LC/MS Pos Early	1986	219.098	5875-41-2	440103	C03740	HMDB0006248	-0.0226427	0.924542	black
gamma-glutamyl-alpha-lysine	Peptide	Gamma-glutamyl Amino Acid	55015	LC/MS Pos Early	2784	276.155	5978-23-4	65254		HMDB0029154	-0.0579739	0.867608	black
gamma-glutamyl-epsilon-lysine	Peptide	Gamma-glutamyl Amino Acid	33934	LC/MS Pos Early	2717	276.155	17105-15-6	7015684		HMDB0003869	-0.0505578	0.874433	black
gamma-glutamylglutamate	Peptide	Gamma-glutamyl Amino Acid	36738	LC/MS Pos Early	1775	277.103	1116-22-9	92865	C05282	HMDB0011737	0.0237713	0.924948	black
gamma-glutamylglutamine	Peptide	Gamma-glutamyl Amino Acid	2730	LC/MS Pos Early	1430	276.119	10148-81-9	150914	C05283	HMDB0011738	-0.0334436	0.867608	blue
gamma-glutamylglycine	Peptide	Gamma-glutamyl Amino Acid	33949	LC/MS Pos Early	1535	205.082	1948-29-4	165527		HMDB0011667	-0.14907	0.484022	greenyellow
gamma-glutamylhistidine	Peptide	Gamma-glutamyl Amino Acid	18245	LC/MS Pos Early	2740	285.119	37460-15-4	7017195		HMDB0029151	-0.189399	0.346357	yellow
gamma-glutamylisoleucine*	Peptide	Gamma-glutamyl Amino Acid	34456	LC/MS Pos Early	2940	261.144	23632-83-9	22885096		HMDB0011170	-0.0715101	0.810221	red
gamma-glutamylleucine	Peptide	Gamma-glutamyl Amino Acid	18369	LC/MS Pos Early	2991	261.144	2566-39-4	151023		HMDB0011171	0.0139559	0.924948	magenta
gamma-glutamylmethionine	Peptide	Gamma-glutamyl Amino Acid	44872	LC/MS Pos Early	2640	279.101	17663-87-5	7009567		HMDB0034367	-0.101384	0.754715	black
gamma-glutamylphenylalanine	Peptide	Gamma-glutamyl Amino Acid	33422	LC/MS Pos Early	2992	295.129	7432-24-8	111299		HMDB0000594	0.0121025	0.924948	yellow
gamma-glutamylserine	Peptide	Gamma-glutamyl Amino Acid	54914	LC/MS Pos Early	1351	235.093	5875-35-4	22844748		HMDB0029158	-0.135403	0.39554	red
gamma-glutamylthreonine	Peptide	Gamma-glutamyl Amino Acid	33364	LC/MS Pos Early	1750	249.108	5652-48-2	53861142		HMDB0029159	-0.071645	0.809047	yellow
gamma-glutamyltryptophan	Peptide	Gamma-glutamyl Amino Acid	33947	LC/MS Pos Early	2975	334.14	66471-20-3	3038501		HMDB0029160	-0.0267471	0.887984	green
gamma-glutamyltyrosine	Peptide	Gamma-glutamyl Amino Acid	2734	LC/MS Pos Early	2508	311.124	7432-23-7	94340		HMDB0011741	-0.000425823	0.948692	black
gamma-glutamylvaline	Peptide	Gamma-glutamyl Amino Acid	43829	LC/MS Pos Early	2700	247.129	2746-34-1	7015683		HMDB0011172	0.154655	0.658703	grey
gamma-tocopherol/beta-tocopherol	Cofactors and Vitamins	Tocopherol Metabolism	52473	LC/MS Pos Late	2384	416.364					0.128641	0.788578	grey
gentisate	Amino Acid	Phenylalanine and Tyrosine Metabolism	18280	LC/MS Neg	1459.8	153.019	490-79-9	3469	C00628	HMDB0000152	0.124183	0.859279	brown
glucose	Carbohydrate	Glycolysis, Gluconeogenesis, and Pyruvate Metabolism	48152	LC/MS Polar	2342	225.062	50-99-7	5793	C00031	HMDB0000122	-0.0340549	0.874433	grey
glucuronate	Carbohydrate	Aminosugar Metabolism	15443	LC/MS Polar	3233.3	193.035	1700908	444791	C00191	HMDB0000127	-0.0940394	0.787301	red
glutamate	Amino Acid	Glutamate Metabolism	57	LC/MS Pos Early	1500	148.06	56-86-0	33032	C00025	HMDB0000148	0.043181	0.877333	blue
glutamate, gamma-methyl ester	Amino Acid	Glutamate Metabolism	33487	LC/MS Pos Early	2170	162.076				HMDB0061715	-0.0817924	0.753519	brown
glutamine	Amino Acid	Glutamate Metabolism	53	LC/MS Pos Early	1291	147.076	56-85-9	5961	C00064	HMDB0000641	-0.0462697	0.753519	brown
glutaminylthreonine	Peptide	Dipeptide	54759	LC/MS Pos Early	2014	248.124	74408-69-8	53877870		HMDB0028807	0.0526468	0.884261	green
glutarate (pentanedioate)	Amino Acid	Lysine Metabolism	396	LC/MS Polar	2900	131.035	110-94-1	743	C00489	HMDB0000661	-0.0106091	0.941985	pink
glutaroylcarnitine (C5)	Amino Acid	Lysine Metabolism	44664	LC/MS Pos Early	2393	276.144	102636-82-8	53481699		HMDB0013130	0.103554	0.782011	yellow
glycerate	Carbohydrate	Glycolysis, Gluconeogenesis, and Pyruvate Metabolism	1572	LC/MS Polar	2070.4	105.019	473-81-4	439194	C00258	HMDB0000139	0.0607249	0.799905	blue
glycerol	Lipid	Glycerolipid Metabolism	15122	LC/MS Neg	758	91.0401	56-81-5	753	C00116	HMDB0000131	0.0263227	0.924948	blue
glycerol 3-phosphate	Lipid	Glycerolipid Metabolism	43847	LC/MS Pos Early	580	173.021	57-03-4	439162	C00093	HMDB0000126	-0.0827287	0.658703	brown
glycerophosphoethanolamine	Lipid	Phospholipid Metabolism	37455	LC/MS Pos Early	659	216.063	1190-00-7	22833510	C01233	HMDB0000114	0.0141069	0.922716	blue
glycerophosphoinositol*	Lipid	Phospholipid Metabolism	52307	LC/MS Neg	630	333.059					0.120234	0.84262	brown
glycerophosphorylcholine (GPC)	Lipid	Phospholipid Metabolism	15990	LC/MS Pos Early	672	258.11	28319-77-9	71920	C00670	HMDB0000086	0.0364146	0.877743	red
glycerophosphoserine*	Lipid	Phospholipid Metabolism	57404	LC/MS Pos Early	577	260.053					-0.0167494	0.924948	brown
glycine	Amino Acid	Glycine, Serine and Threonine Metabolism	58	LC/MS Pos Early	1375	76.0393	56-40-6	750	C00037	HMDB0000123	-0.111582	0.56057	grey
glycochenodeoxycholate	Lipid	Primary Bile Acid Metabolism	32346	LC/MS Neg	5236.1	448.307	640-79-9	22833540	C05466	HMDB0000637	-0.172896	0.788578	grey
glycochenodeoxycholate glucuronide (1)	Lipid	Primary Bile Acid Metabolism	52983	LC/MS Neg	4806	311.666					0.0866481	0.887984	grey
glycochenodeoxycholate sulfate	Lipid	Primary Bile Acid Metabolism	52974	LC/MS Neg	4820	263.628					0.00892156	0.943887	green
glycocholate	Lipid	Primary Bile Acid Metabolism	18476	LC/MS Neg	5163	464.302	475-31-0	23617285	C01921	HMDB0000138	-0.107655	0.874433	grey
glycocholenate sulfate*	Lipid	Secondary Bile Acid Metabolism	32599	LC/MS Neg	4750	254.623					0.121315	0.809047	grey
glycodeoxycholate	Lipid	Secondary Bile Acid Metabolism	18477	LC/MS Neg	5281	448.307	360-65-6	22833539	C05464	HMDB0000631	-0.232268	0.754715	brown
glycodeoxycholate sulfate	Lipid	Secondary Bile Acid Metabolism	52975	LC/MS Neg	4875	263.628					0.0875239	0.877333	green
glycohyocholate	Lipid	Secondary Bile Acid Metabolism	42574	LC/MS Neg	5020	464.302					-0.143449	0.788578	green
glycolithocholate	Lipid	Secondary Bile Acid Metabolism	31912	LC/MS Neg	5357.1	432.312	474-74-8	115245	C15557	HMDB0000698	-0.195392	0.782011	grey
glycolithocholate sulfate*	Lipid	Secondary Bile Acid Metabolism	32620	LC/MS Neg	5011	255.631	15324-64-8	53477756	C11301	HMDB0002639	-0.0353359	0.924948	yellow
glycosyl ceramide (d18:1/23:1, d17:1/24:1)*	Lipid	Ceramides	57448	LC/MS Pos Late	3667	796.666					0.0341946	0.916376	brown
glycosyl ceramide (d18:2/24:1, d18:1/24:2)*	Lipid	Ceramides	57453	LC/MS Pos Late	3380	808.666					0.00917161	0.943715	red
glycosyl-N-(2-hydroxynervonoyl)-sphingosine (d18:1/24:1(2OH))*	Lipid	Sphingolipid Metabolism	57444	LC/MS Pos Late	3839	826.677					-0.0115162	0.937319	red
glycosyl-N-palmitoyl-sphingosine (d18:1/16:0)	Lipid	Sphingolipid Metabolism	53013	LC/MS Pos Late	2623	700.572					0.0811816	0.732684	grey
glycosyl-N-stearoyl-sphingosine (d18:1/18:0)	Lipid	Sphingolipid Metabolism	52234	LC/MS Pos Late	3053	728.604					0.060059	0.788578	magenta
glycosyl-N-tricosanoyl-sphingadienine (d18:2/23:0)*	Lipid	Sphingolipid Metabolism	57445	LC/MS Pos Late	3724	796.666					-0.0298203	0.922833	red
glycoursodeoxycholate	Lipid	Secondary Bile Acid Metabolism	39379	LC/MS Neg	5033	448.307	64480-66-6	12310288		HMDB0000708	-0.229609	0.754715	grey
glycylglycine	Peptide	Dipeptide	21029	LC/MS Polar	2400	131.046	556-50-3	11163	C02037	HMDB0011733	-0.0213395	0.930261	blue
glycylphenylalanine	Peptide	Dipeptide	33954	LC/MS Pos Early	3068	223.108		97415		HMDB0028848	0.0391047	0.893961	brown
glycylproline	Peptide	Dipeptide	22171	LC/MS Pos Early	2324	173.092	704-15-4	79101		HMDB0000721	0.0447846	0.887984	brown
glycylvaline	Peptide	Dipeptide	18357	LC/MS Pos Early	2734	175.108		97417		HMDB0028854	0.0843646	0.880414	blue
guanidinoacetate	Amino Acid	Creatine Metabolism	43802	LC/MS Polar	2884	116.047	352-97-6	763	C00581	HMDB0000128	-0.0568206	0.830626	tan
guanidinosuccinate	Amino Acid	Guanidino and Acetamido Metabolism	32446	LC/MS Polar	3550	174.052	6133-30-8	439918	C03139	HMDB0003157	0.0728257	0.880373	green
guanosine	Nucleotide	Purine Metabolism, Guanine containing	1573	LC/MS Neg	1662	282.084	118-00-3	6802	C00387	HMDB0000133	0.0979153	0.89051	brown
gulonate*	Cofactors and Vitamins	Ascorbate and Aldarate Metabolism	46957	LC/MS Polar	2750	195.051	20246-53-1	152304	C00800	HMDB0003290	0.317862	0.526721	grey
heme	Cofactors and Vitamins	Hemoglobin and Porphyrin Metabolism	41754	LC/MS Pos Late	1124	616.176	14875-96-8		C00032	HMDB0003178	0.188772	0.799905	blue
heptanoate (7:0)	Lipid	Medium Chain Fatty Acid	1644	LC/MS Neg	3670	129.092	111-14-8	8094	C17714	HMDB0000666	0.094013	0.788578	grey
hexadecanedioate (C16)	Lipid	Fatty Acid, Dicarboxylate	35678	LC/MS Neg	4615	285.207	505-54-4	10459	C19615	HMDB0000672	-0.213193	0.703136	brown
hexanoylcarnitine (C6)	Lipid	Fatty Acid Metabolism(Acyl Carnitine)	32328	LC/MS Pos Early	3308	260.186	6418-78-6	6426853		HMDB0000705	0.0626438	0.887984	tan
hexanoylglutamine	Lipid	Fatty Acid Metabolism (Acyl Glutamine)	54907	LC/MS Neg	2780	243.135					0.0313556	0.924948	magenta
hexanoylglycine (C6)	Lipid	Fatty Acid Metabolism(Acyl Glycine)	35436	LC/MS Neg	2900	172.098	24003-67-6	99463		HMDB0000701	-0.0387659	0.924542	tan
histidine	Amino Acid	Histidine Metabolism	59	LC/MS Neg	755.9	154.062	71-00-1	6274	C00135	HMDB0000177	-0.203769	0.278238	grey
histidylglutamate	Peptide	Dipeptide	41963	LC/MS Pos Early	2961	285.119		9838731		HMDB0028884	0.104627	0.799905	green
histidylglycine	Peptide	Dipeptide	41368	LC/MS Pos Early	2970	213.098		351662		HMDB0028885	-0.0626663	0.874433	pink
histidylleucine	Peptide	Dipeptide	40061	LC/MS Pos Early	3340	269.161		440549	C05010	HMDB0028889	-0.117732	0.788578	greenyellow
histidylphenylalanine	Peptide	Dipeptide	42084	LC/MS Pos Early	3320	303.145		4466133		HMDB0028892	0.00157884	0.946745	black
histidyltryptophan	Peptide	Dipeptide	41912	LC/MS Neg	2555	340.142		6539217		HMDB0028896	-0.0509814	0.877333	brown
homoarginine	Amino Acid	Urea cycle; Arginine and Proline Metabolism	22137	LC/MS Pos Early	2882	189.135	156-86-5	9085	C01924	HMDB0000670	0.0806527	0.80514	brown
homocitrulline	Amino Acid	Urea cycle; Arginine and Proline Metabolism	22138	LC/MS Polar	3006.8	188.104	1190-49-4	65072	C02427	HMDB0000679	0.265636	0.658703	yellow
HWESASXX*	Peptide	Polypeptide	32836	LC/MS Pos Late	810	471.738					0.221849	0.490338	magenta
hydantoin-5-propionic acid	Amino Acid	Histidine Metabolism	40473	LC/MS Polar	2080	171.041	5624-26-0	782	C05565	HMDB0001212	-0.012082	0.943715	grey
hydroxyproline	Amino Acid	Urea cycle; Arginine and Proline Metabolism	32306	LC/MS Pos Early	1064	132.065	51-35-4	5810	C01157	HMDB0000725	-0.0885226	0.797707	pink
hyocholate	Lipid	Secondary Bile Acid Metabolism	34093	LC/MS Neg	5046	407.28	547-75-1			HMDB0000760	-0.235676	0.56057	brown
hypotaurine	Amino Acid	Methionine, Cysteine, SAM and Taurine Metabolism	590	LC/MS Pos Early	724	110.027	300-84-5	107812	C00519	HMDB0000965	0.199986	0.346357	brown
hypoxanthine	Nucleotide	Purine Metabolism, (Hypo)Xanthine/Inosine containing	3127	LC/MS Neg	1291.2	135.031	68-94-0	790	C00262	HMDB0000157	0.0234086	0.891357	grey
imidazole lactate	Amino Acid	Histidine Metabolism	15716	LC/MS Pos Early	2040	157.061	876-19-7	459122	C05132	HMDB0002320	-0.147374	0.67726	greenyellow
imidazole propionate	Amino Acid	Histidine Metabolism	40730	LC/MS Pos Early	2263	141.066	1074-59-5	70630	C20522	HMDB0002271	-0.0652058	0.887984	black
indole-3-carboxylic acid	Amino Acid	Tryptophan Metabolism	38116	LC/MS Neg	1708.8	160.04	771-50-6	69867	C19837	HMDB0003320	0.0535578	0.810221	purple
indoleacetate	Amino Acid	Tryptophan Metabolism	27513	LC/MS Pos Early	2850	176.071	87-51-4	802	C00954	HMDB0000197	-0.0203457	0.924948	blue
indoleacetylglutamine	Amino Acid	Tryptophan Metabolism	42087	LC/MS Pos Early	2185	304.129	1825942	25200879		HMDB0013240	-0.0887087	0.859279	brown
indolelactate	Amino Acid	Tryptophan Metabolism	18349	LC/MS Pos Early	2600	206.081	1821-52-9	92904	C02043	HMDB0000671	0.0431174	0.874433	brown
indolepropionate	Amino Acid	Tryptophan Metabolism	32405	LC/MS Pos Early	3205	190.086	830-96-6	3744		HMDB0002302	-0.0798545	0.887984	greenyellow
indolepropionylglycine	Amino Acid	Tryptophan Metabolism	54917	LC/MS Neg	2926	245.093					-0.0642572	0.856857	yellow
inosine	Nucleotide	Purine Metabolism, (Hypo)Xanthine/Inosine containing	1123	LC/MS Neg	1602.1	267.074	58-63-9	6021	C00294	HMDB0000195	0.0779509	0.887984	grey
isobutyrylcarnitine (C4)	Amino Acid	Leucine, Isoleucine and Valine Metabolism	33441	LC/MS Pos Early	2810	232.154	25518-49-4	168379		HMDB0000736	0.144618	0.788578	brown
isobutyrylglycine (C4)	Amino Acid	Leucine, Isoleucine and Valine Metabolism	35437	LC/MS Neg	1420	144.067	15926-18-8	10855600		HMDB0000730	-0.0543215	0.874433	grey
isoleucine	Amino Acid	Leucine, Isoleucine and Valine Metabolism	1125	LC/MS Pos Early	2800	132.102	73-32-5	6306	C00407	HMDB0000172	-0.0681626	0.788578	blue
isoleucylalanine	Peptide	Dipeptide	40046	LC/MS Pos Early	2742	203.139		5246009		HMDB0028900	-0.0232456	0.924948	grey
isoleucylglycine	Peptide	Dipeptide	40008	LC/MS Neg	1992	187.109		342532		HMDB0028907	-0.131542	0.753519	yellow
isoleucylleucine/leucylisoleucine	Peptide	Dipeptide	52322	LC/MS Pos Early	3242	245.186					-0.129865	0.670325	green
isoleucylproline	Peptide	Dipeptide	35418	LC/MS Pos Early	2906	229.155		342734		HMDB0011174	-0.0183874	0.910384	grey
isoleucylvaline	Peptide	Dipeptide	40049	LC/MS Pos Early	2995	231.17		435949		HMDB0028920	-0.0798601	0.859279	green
isovalerate (C5)	Amino Acid	Leucine, Isoleucine and Valine Metabolism	44656	LC/MS Neg	1564	101.061	503-74-2	10430	C08262	HMDB0000718	-0.074645	0.867608	brown
isovalerylcarnitine (C5)	Amino Acid	Leucine, Isoleucine and Valine Metabolism	34407	LC/MS Pos Early	3085	246.17	31023-24-2	6426851		HMDB0000688	0.00876964	0.943715	pink
isovalerylglycine	Amino Acid	Leucine, Isoleucine and Valine Metabolism	35107	LC/MS Neg	1950	158.082	16284-60-9	546304		HMDB0000678	-0.177754	0.670325	yellow
kynurenate	Amino Acid	Tryptophan Metabolism	1417	LC/MS Neg	2224	188.035	492-27-3	3845	C01717	HMDB0000715	0.0782702	0.788578	grey
kynurenine	Amino Acid	Tryptophan Metabolism	15140	LC/MS Pos Early	2739	209.092	2922-83-0	161166	C00328	HMDB0000684	0.173297	0.256427	blue
lactate	Carbohydrate	Glycolysis, Gluconeogenesis, and Pyruvate Metabolism	527	LC/MS Neg	681.6	89.0244	79-33-4	61503	C00256	HMDB0000190	0.00782437	0.930261	black
lactose	Carbohydrate	Disaccharides and Oligosaccharides	567	LC/MS Polar	3500	387.114	63-42-3	84571	C00243	HMDB0000186	-0.00268944	0.946745	brown
lactosyl-N-behenoyl-sphingosine (d18:1/22:0)*	Lipid	Sphingolipid Metabolism	57422	LC/MS Pos Late	3842	946.719					-0.0245964	0.893178	brown
lactosyl-N-nervonoyl-sphingosine (d18:1/24:1)*	Lipid	Sphingolipid Metabolism	57370	LC/MS Pos Late	3778	972.735					-0.0608157	0.799905	black
lactosyl-N-palmitoyl-sphingosine (d18:1/16:0)	Lipid	Sphingolipid Metabolism	53010	LC/MS Pos Late	2527	862.625					0.0621974	0.799739	grey
laurate (12:0)	Lipid	Medium Chain Fatty Acid	1645	LC/MS Neg	5300	199.17	143-07-7	3893	C02679	HMDB0000638	-0.101304	0.878743	grey
laurylcarnitine (C12)	Lipid	Fatty Acid Metabolism(Acyl Carnitine)	34534	LC/MS Pos Late	1235	344.279	25518-54-1	168381		HMDB0002250	0.104637	0.874433	grey
leucine	Amino Acid	Leucine, Isoleucine and Valine Metabolism	60	LC/MS Pos Early	2864	132.102	61-90-5	6106	C00123	HMDB0000687	0.000456023	0.948692	magenta
leucylalanine	Peptide	Dipeptide	40010	LC/MS Pos Early	2801	203.139		259321		HMDB0028922	0.0784156	0.809047	blue
leucylglycine	Peptide	Dipeptide	40045	LC/MS Pos Early	2778	189.123		79070		HMDB0028929	-0.00288817	0.943887	yellow
leucylleucine	Peptide	Dipeptide	36756	LC/MS Pos Early	3285	245.186		94244	C11332	HMDB0028933	-0.128667	0.689433	green
leucylphenylalanine/isoleucylphenylalanine	Peptide	Dipeptide	52415	LC/MS Neg	4073	277.156					-0.0324725	0.922927	brown
lignoceroyl sphingomyelin (d18:1/24:0)	Lipid	Sphingolipid Metabolism	57330	LC/MS Pos Late	3437	815.7					0.0525271	0.84262	grey
lignoceroylcarnitine (C24)*	Lipid	Fatty Acid Metabolism(Acyl Carnitine)	57515	LC/MS Pos Late	1603	512.467					0.0562346	0.874433	blue
linoleamide (18:2n6)	Lipid	Fatty Acid, Amide	32455	LC/MS Pos Late	1580	280.264	3072-13-7	6435901		HMDB0062656	0.0906226	0.879708	grey
linoleate (18:2n6)	Lipid	Polyunsaturated Fatty Acid (n3 and n6)	1105	LC/MS Neg	5535	279.233	60-33-3	5280450	C01595	HMDB0000673	0.0468054	0.916296	magenta
linolenate (18:3n3 or 3n6)	Lipid	Polyunsaturated Fatty Acid (n3 and n6)	34035	LC/MS Neg	5450	277.217	506-26-3	5280933	C06426	HMDB0003073	0.0794531	0.89051	grey
linolenoylcarnitine (C18:3)*	Lipid	Fatty Acid Metabolism(Acyl Carnitine)	57511	LC/MS Pos Late	1310	422.327					0.0759724	0.822127	grey
linoleoyl ethanolamide	Lipid	Endocanbinoid	52608	LC/MS Neg	6150	322.275	68171-52-8	5283446		HMDB0012252	0.0972153	0.787463	black
linoleoyl-arachidonoyl-glycerol (18:2/20:4) [1]*	Lipid	Diacylglycerol	54955	LC/MS Pos Late	2566	658.54					0.332074	0.40579	grey
linoleoyl-arachidonoyl-glycerol (18:2/20:4) [2]*	Lipid	Diacylglycerol	54956	LC/MS Pos Late	2624	658.54					0.258273	0.40579	yellow
linoleoylcarnitine (C18:2)*	Lipid	Fatty Acid Metabolism(Acyl Carnitine)	46223	LC/MS Pos Late	1430	424.342	36816-10-1	6450015		HMDB0006469	0.0856315	0.788578	pink
linoleoylcholine*	Lipid	Fatty Acid Metabolism (Acyl Choline)	57463	LC/MS Pos Late	1388	366.337					0.193513	0.788578	grey
linoleoyl-linoleoyl-glycerol (18:2/18:2) [1]*	Lipid	Diacylglycerol	54968	LC/MS Pos Late	2689	634.54					0.665491	0.199406	black
L-urobilin	Cofactors and Vitamins	Hemoglobin and Porphyrin Metabolism	40173	LC/MS Pos Late	901	595.349	34217-90-8	5280818	C05793	HMDB0004159	-0.0160443	0.937319	brown
lysine	Amino Acid	Lysine Metabolism	1301	LC/MS Pos Early	2850	147.113	56-87-1	5962	C00047	HMDB0000182	-0.00412304	0.943715	black
lysylglutamine	Peptide	Dipeptide	54768	LC/MS Pos Early	2979	275.171		16058901		HMDB0028949	0.189145	0.658703	grey
malate	Energy	TCA Cycle	1303	LC/MS Neg	615.6	133.014	97-67-6	222656	C00149	HMDB0000156	-0.0728501	0.810221	yellow
maleate	Lipid	Fatty Acid, Dicarboxylate	20676	LC/MS Polar	2510	115.004	110-16-7	444972	C00122	HMDB0000176	-0.205426	0.658703	grey
malonate	Lipid	Fatty Acid Synthesis	15872	LC/MS Polar	3447	103.004	141-82-2	867	C04025	HMDB0000691	0.0472487	0.924542	black
maltose	Carbohydrate	Glycogen Metabolism	15586	LC/MS Polar	3329.4	387.114	69-79-4	10991489	C00208	HMDB0000163	-0.106595	0.84262	blue
mannitol/sorbitol	Carbohydrate	Fructose, Mannose and Galactose Metabolism	46142	LC/MS Polar	2260	181.072	50-70-4	5780	C00794	HMDB0000247	-0.0541042	0.924948	black
mannose	Carbohydrate	Fructose, Mannose and Galactose Metabolism	48153	LC/MS Polar	2200	225.062	3458-28-4	18950	C00159	HMDB0000169	0.115454	0.711102	magenta
margarate (17:0)	Lipid	Long Chain Fatty Acid	1121	LC/MS Neg	5731	269.249	506-12-7	10465		HMDB0002259	0.0517448	0.893961	grey
margaroylcarnitine*	Lipid	Fatty Acid Metabolism(Acyl Carnitine)	57512	LC/MS Pos Late	1424	414.358	106182-29-0	53477803		HMDB0006210	0.0507415	0.878743	tan
methionine	Amino Acid	Methionine, Cysteine, SAM and Taurine Metabolism	1302	LC/MS Pos Early	2526	150.058	63-68-3	6137	C00073	HMDB0000696	-0.107197	0.658703	red
methionine sulfone	Amino Acid	Methionine, Cysteine, SAM and Taurine Metabolism	44878	LC/MS Pos Early	1250	182.048					-0.02241	0.924948	black
methionine sulfoxide	Amino Acid	Methionine, Cysteine, SAM and Taurine Metabolism	18374	LC/MS Pos Early	1272	166.053	62697-73-8	847		HMDB0002005	-0.148216	0.660921	red
methylmalonate (MMA)	Lipid	Fatty Acid Metabolism (also BCAA Metabolism)	1496	LC/MS Polar	3078.4	117.019	516-05-2	487	C02170	HMDB0000202	-0.0595648	0.874433	brown
methylpalmitate (15 or 2)	Lipid	Fatty Acid, Branched	38768	LC/MS Neg	5695	269.249					0.00629152	0.943887	brown
methylphosphate	Nucleotide	Purine and Pyrimidine Metabolism	37070	LC/MS Pos Early	544	113				HMDB0061711	0.00550885	0.943715	yellow
methylsuccinate	Amino Acid	Leucine, Isoleucine and Valine Metabolism	15745	LC/MS Polar	2800	131.035	498-21-5	10349	C08645	HMDB0001844	-0.120213	0.753519	yellow
methylsuccinoylcarnitine (1)	Amino Acid	Leucine, Isoleucine and Valine Metabolism	53031	LC/MS Pos Early	2589	276.144					-0.0218327	0.924948	grey
myo-inositol	Lipid	Inositol Metabolism	1124	LC/MS Polar	3506.3	225.062	87-89-8		C00137	HMDB0000211	0.0303362	0.877333	grey
myristate (14:0)	Lipid	Long Chain Fatty Acid	1365	LC/MS Neg	5440	227.202	544-63-8	11005	C06424	HMDB0000806	-0.0506969	0.924542	grey
myristoleate (14:1n5)	Lipid	Long Chain Fatty Acid	32418	LC/MS Neg	5346.9	225.186	544-64-9	5281119	C08322	HMDB0002000	0.0368331	0.930261	magenta
myristoleoylcarnitine (C14:1)*	Lipid	Fatty Acid Metabolism(Acyl Carnitine)	48182	LC/MS Pos Late	1316	370.295					0.114355	0.874433	greenyellow
myristoyl dihydrosphingomyelin (d18:0/14:0)*	Lipid	Sphingolipid Metabolism	57365	LC/MS Pos Late	2060	677.559		44260138	C00550	HMDB0012085	-0.0127547	0.924948	magenta
myristoylcarnitine (C14)	Lipid	Fatty Acid Metabolism(Acyl Carnitine)	33952	LC/MS Pos Late	1350	372.311	25597-07-3	53477791		HMDB0005066	-2.26616e-05	0.949826	greenyellow
N1-Methyl-2-pyridone-5-carboxamide	Cofactors and Vitamins	Nicotite and Nicotimide Metabolism	40469	LC/MS Pos Early	1250	153.066	701-44-0	69698	C05842	HMDB0004193	0.114698	0.857339	blue
N1-methylinosine	Nucleotide	Purine Metabolism, (Hypo)Xanthine/Inosine containing	48351	LC/MS Pos Early	1430	283.104	2140-73-0	65095		HMDB0002721	0.20522	0.52908	pink
N2,N2-dimethylguanosine	Nucleotide	Purine Metabolism, Guanine containing	35137	LC/MS Pos Early	2210	312.13	2140-67-2	92919		HMDB0004824	0.164699	0.285203	greenyellow
N2-acetyllysine	Amino Acid	Lysine Metabolism	36751	LC/MS Polar	3372.6	187.109	1946-82-3	192590	C12989	HMDB0000446	0.350913	0.330136	yellow
N4-acetylcytidine	Nucleotide	Pyrimidine Metabolism, Cytidine containing	35130	LC/MS Pos Early	1580	286.103	3768-18-1	107461		HMDB0005923	-0.0617597	0.874433	blue
N6,N6,N6-trimethyllysine	Amino Acid	Lysine Metabolism	1498	LC/MS Pos Early	2825	189.16	19253-88-4	440120	C03793	HMDB0001325	0.0631823	0.810221	greenyellow
N6-acetyllysine	Amino Acid	Lysine Metabolism	36752	LC/MS Polar	2612.6	187.109	692-04-6	92832	C02727	HMDB0000206	0.0757543	0.788578	red
N6-carbamoylthreonyladenosine	Nucleotide	Purine Metabolism, Adenine containing	35157	LC/MS Neg	2164	411.127	89019-62-5	92021849		HMDB0041623	0.0447962	0.856857	yellow
N6-carboxymethyllysine	Carbohydrate	Advanced Glycation End-product	36713	LC/MS Pos Early	2500	205.118					0.17761	0.754715	grey
N6-succinyladenosine	Nucleotide	Purine Metabolism, Adenine containing	48130	LC/MS Neg	980	382.1	4542-23-8	20849086		HMDB0000912	0.160751	0.346357	magenta
N-acetyl-1-methylhistidine*	Amino Acid	Histidine Metabolism	43255	LC/MS Pos Early	2100	212.103					0.358887	0.357343	grey
N-acetyl-3-methylhistidine*	Amino Acid	Histidine Metabolism	43256	LC/MS Pos Early	2056	212.103					0.150268	0.797707	red
N-acetylalanine	Amino Acid	Alanine and Aspartate Metabolism	1585	LC/MS Neg	861.2	130.051	97-69-8	88064		HMDB0000766	0.0683963	0.658703	red
N-acetylarginine	Amino Acid	Urea cycle; Arginine and Proline Metabolism	33953	LC/MS Pos Early	2245	217.13	155-84-0	67427		HMDB0004620	0.0982597	0.783393	yellow
N-acetylasparagine	Amino Acid	Alanine and Aspartate Metabolism	33942	LC/MS Pos Early	785	175.071	4033-40-3	99715		HMDB0006028	-0.0168738	0.924948	yellow
N-acetylaspartate (NAA)	Amino Acid	Alanine and Aspartate Metabolism	22185	LC/MS Polar	3143	174.041	997-55-7	65065	C01042	HMDB0000812	0.0706314	0.753519	green
N-acetyl-aspartyl-glutamate (NAAG)	Amino Acid	Glutamate Metabolism	35665	LC/MS Pos Early	1035	305.098	3106-85-2	5255	C12270	HMDB0001067	-0.0424917	0.878743	grey
N-acetyl-beta-alanine	Nucleotide	Pyrimidine Metabolism, Uracil containing	37432	LC/MS Neg	773	130.051	3025-95-4	76406	C01073	HMDB0061880	0.0540584	0.873673	blue
N-acetyl-cadaverine	Amino Acid	Lysine Metabolism	43530	LC/MS Pos Early	2385	145.133	32343-73-0	189087		HMDB0002284	-0.212618	0.753519	blue
N-acetylcarnosine	Peptide	Dipeptide Derivative	43488	LC/MS Neg	1235	267.11	56353-15-2	10221026		HMDB0012881	0.0777942	0.810221	grey
N-acetylcitrulline	Amino Acid	Urea cycle; Arginine and Proline Metabolism	48434	LC/MS Neg	940	216.099	33965-42-3	11506771	C15532	HMDB0000856	0.185177	0.759857	brown
N-acetylglucosamine/N-acetylgalactosamine	Carbohydrate	Aminosugar Metabolism	46539	LC/MS Pos Early	715	222.097	7512-17-6	439174	C00140	HMDB0000215	-0.00058452	0.946745	brown
N-acetylglucosaminylasparagine	Carbohydrate	Aminosugar Metabolism	48149	LC/MS Pos Early	1212	336.14	2776-93-4	123826	C04540	HMDB0000489	0.0440644	0.874433	greenyellow
N-acetylglutamate	Amino Acid	Glutamate Metabolism	15720	LC/MS Polar	3106	188.056	1188-37-0	185	C00624	HMDB0001138	-0.0222163	0.924542	black
N-acetylglutamine	Amino Acid	Glutamate Metabolism	33943	LC/MS Polar	2140	187.072	2490-97-3	25561		HMDB0006029	0.0320229	0.916376	brown
N-acetylglycine	Amino Acid	Glycine, Serine and Threonine Metabolism	27710	LC/MS Neg	731	116.035	543-24-8	10972		HMDB0000532	-0.08483	0.874433	grey
N-acetylhistidine	Amino Acid	Histidine Metabolism	33946	LC/MS Neg	900	196.073	218084	273260	C02997	HMDB0032055	-0.0273225	0.924542	blue
N-acetylisoleucine	Amino Acid	Leucine, Isoleucine and Valine Metabolism	33967	LC/MS Neg	2325	172.098				HMDB0061684	0.0323688	0.911942	grey
N-acetylkynurenine (2)	Amino Acid	Tryptophan Metabolism	48757	LC/MS Pos Early	2364	251.103					0.0643795	0.877333	blue
N-acetylleucine	Amino Acid	Leucine, Isoleucine and Valine Metabolism	1587	LC/MS Neg	2400	172.098	1188-21-2	70912	C02710	HMDB0011756	-0.00778848	0.941985	brown
N-acetylmethionine	Amino Acid	Methionine, Cysteine, SAM and Taurine Metabolism	1589	LC/MS Neg	1787	190.054	65-82-7	6180	C02712	HMDB0011745	0.0433084	0.855509	green
N-acetylmethionine sulfoxide	Amino Acid	Methionine, Cysteine, SAM and Taurine Metabolism	45428	LC/MS Pos Early	880	208.064					0.0427194	0.874433	grey
N-acetylneuraminate	Carbohydrate	Aminosugar Metabolism	32377	LC/MS Polar	3072.6	308.099	131-48-6	445063	C19910	HMDB0000230	0.194831	0.253605	yellow
N-acetylphenylalanine	Amino Acid	Phenylalanine and Tyrosine Metabolism	33950	LC/MS Neg	2597	206.082	2018-61-3	74839	C03519	HMDB0000512	0.093842	0.759857	brown
N-acetylproline	Amino Acid	Urea cycle; Arginine and Proline Metabolism	34387	LC/MS Pos Early	1695	158.081	68-95-1			HMDB0094701	0.0326752	0.896339	pink
N-acetylputrescine	Amino Acid	Polyamine Metabolism	37496	LC/MS Pos Early	2230	131.118	18233-70-0	122356	C02714	HMDB0002064	0.0953817	0.689433	magenta
N-acetylserine	Amino Acid	Glycine, Serine and Threonine Metabolism	37076	LC/MS Polar	2000	146.046	16354-58-8	65249		HMDB0002931	0.0696053	0.689433	red
N-acetyltaurine	Amino Acid	Methionine, Cysteine, SAM and Taurine Metabolism	48187	LC/MS Neg	800	166.018	19213-70-8	159864		HMDB0240253	-0.032875	0.922833	greenyellow
N-acetylthreonine	Amino Acid	Glycine, Serine and Threonine Metabolism	33939	LC/MS Neg	821.6	160.061	17093-74-2	152204		HMDB0062557	0.0684774	0.788578	brown
N-acetyltryptophan	Amino Acid	Tryptophan Metabolism	33959	LC/MS Neg	2630	245.093	1218-34-4	700653		HMDB0013713	0.11256	0.689433	red
N-acetyltyrosine	Amino Acid	Phenylalanine and Tyrosine Metabolism	32390	LC/MS Neg	1680	222.077	537-55-3	68310	C01657	HMDB0000866	0.12217	0.764577	greenyellow
N-acetylvaline	Amino Acid	Leucine, Isoleucine and Valine Metabolism	1591	LC/MS Neg	1704	158.082	3067-19-4	227752		HMDB0011757	0.0484307	0.788578	red
N-alpha-acetylornithine	Amino Acid	Urea cycle; Arginine and Proline Metabolism	32984	LC/MS Pos Early	2000	175.108	6205-08-09	439232	C00437	HMDB0003357	0.0824194	0.788578	grey
N-behenoyl-sphingadienine (d18:2/22:0)*	Lipid	Sphingolipid Metabolism	57372	LC/MS Pos Late	3911	620.598					0.324977	0.526721	grey
N-delta-acetylornithine	Amino Acid	Urea cycle; Arginine and Proline Metabolism	43249	LC/MS Neg	858	173.093					-0.0180172	0.933649	grey
nervonoylcarnitine (C24:1)*	Lipid	Fatty Acid Metabolism(Acyl Carnitine)	57531	LC/MS Pos Late	1602	510.452					0.108851	0.754715	green
N-formylmethionine	Amino Acid	Methionine, Cysteine, SAM and Taurine Metabolism	2829	LC/MS Neg	1543.8	176.039	4289-98-9	6995182	C03145	HMDB0001015	0.0694887	0.753519	tan
N-formylphenylalanine	Amino Acid	Phenylalanine and Tyrosine Metabolism	48433	LC/MS Neg	2360	192.067					0.0230982	0.924948	grey
nicotinamide	Cofactors and Vitamins	Nicotite and Nicotimide Metabolism	594	LC/MS Pos Early	1942	123.055	98-92-0	936	C00153	HMDB0001406	0.13609	0.757128	grey
N-methylproline	Amino Acid	Urea cycle; Arginine and Proline Metabolism	37431	LC/MS Pos Early	1335	130.086					-0.119473	0.89051	blue
N-methyltaurine	Amino Acid	Methionine, Cysteine, SAM and Taurine Metabolism	42989	LC/MS Polar	1576	138.023					0.00481269	0.946721	brown
N-nervonoyl-hexadecasphingosine (d16:1/24:1)*	Lipid	Sphingolipid Metabolism	57435	LC/MS Pos Late	3850	620.598					0.297538	0.346357	grey
nonadecanoate (19:0)	Lipid	Long Chain Fatty Acid	1356	LC/MS Neg	6068	297.28	646-30-0	12591	C16535	HMDB0000772	0.0226312	0.924542	blue
N-palmitoylglycine	Lipid	Fatty Acid Metabolism(Acyl Glycine)	42092	LC/MS Neg	5580	312.254	158305-64-7	151008		HMDB0013034	-0.024153	0.922716	tan
N-palmitoyl-heptadecasphingosine (d17:1/16:0)*	Lipid	Sphingolipid Metabolism	57430	LC/MS Pos Late	2645	524.504					0.256312	0.199406	yellow
N-palmitoyl-sphinganine (d18:0/16:0)	Lipid	Sphingolipid Metabolism	52604	LC/MS Pos Late	3090	540.535		5283572		HMDB0011760	-0.0568418	0.874433	red
N-palmitoyl-sphingosine (d18:1/16:0)	Lipid	Sphingolipid Metabolism	44877	LC/MS Pos Late	2893	538.519		5283564	C00195	HMDB0004949	0.190846	0.23237	brown
N-palmitoyltaurine	Lipid	Endocanbinoid	39835	LC/MS Neg	5560	362.237					-0.064543	0.809047	green
N-stearoyl-sphinganine (d18:0/18:0)*	Lipid	Sphingolipid Metabolism	1759	LC/MS Pos Late	3526	568.566		5283573		HMDB0011761	0.190376	0.753519	grey
N-stearoyl-sphingosine (d18:1/18:0)*	Lipid	Sphingolipid Metabolism	54979	LC/MS Pos Late	3392	566.551		5283565	C00195	HMDB0004950	0.217342	0.346357	brown
N-stearoyltaurine	Lipid	Endocanbinoid	39730	LC/MS Neg	5782	390.268					-0.136821	0.527853	yellow
O-acetylhomoserine	Amino Acid	Glycine, Serine and Threonine Metabolism	31539	LC/MS Polar	1850	160.061	7540-67-2	528		HMDB0029423	-0.000175118	0.949826	grey
o-cresol sulfate	Amino Acid	Phenylalanine and Tyrosine Metabolism	36845	LC/MS Neg	2796	187.007					-0.0988992	0.816532	brown
octadecanedioate (C18)	Lipid	Fatty Acid, Dicarboxylate	36754	LC/MS Neg	5043	313.238	871-70-5	70095		HMDB0000782	-0.308452	0.409172	blue
octanoylcarnitine (C8)	Lipid	Fatty Acid Metabolism(Acyl Carnitine)	33936	LC/MS Pos Late	950	288.217	25243-95-2	11953814	C02838	HMDB0000791	0.197221	0.788578	magenta
oleamide	Lipid	Fatty Acid, Amide	32458	LC/MS Neg	6581	280.265	301-02-0	5283387	C19670	HMDB0002117	0.0379528	0.924948	magenta
oleate/vaccenate (18:1)	Lipid	Long Chain Fatty Acid	52285	LC/MS Neg	5655	281.249					0.0941525	0.877333	grey
oleoyl ethanolamide	Lipid	Endocanbinoid	38102	LC/MS Neg	6450	324.291	111-58-0	5283454		HMDB0002088	0.0882646	0.788578	grey
oleoyl-arachidonoyl-glycerol (18:1/20:4) [1]*	Lipid	Diacylglycerol	54960	LC/MS Pos Late	2907	660.556					0.212278	0.56057	grey
oleoyl-arachidonoyl-glycerol (18:1/20:4) [2]*	Lipid	Diacylglycerol	54961	LC/MS Pos Late	2990	660.556					0.108674	0.788578	pink
oleoylcarnitine (C18)	Lipid	Fatty Acid Metabolism(Acyl Carnitine)	35160	LC/MS Pos Late	1423	426.358	38677-66-6	46907933		HMDB0005065	0.10259	0.753519	grey
oleoylcholine	Lipid	Fatty Acid Metabolism (Acyl Choline)	53260	LC/MS Pos Late	1449	368.352					0.223365	0.754715	grey
oleoyl-linoleoyl-glycerol (18:1/18:2) [1]	Lipid	Diacylglycerol	46798	LC/MS Pos Late	3115	636.556					0.410892	0.278238	grey
oleoyl-linoleoyl-glycerol (18:1/18:2) [2]	Lipid	Diacylglycerol	46799	LC/MS Pos Late	3223	636.556					0.39994	0.253605	grey
oleoyl-oleoyl-glycerol (18:1/18:1) [1]*	Lipid	Diacylglycerol	54945	LC/MS Pos Late	3571	638.572					0.377225	0.256427	black
oleoyl-oleoyl-glycerol (18:1/18:1) [2]*	Lipid	Diacylglycerol	54946	LC/MS Pos Late	3695	638.572					0.3853	0.253605	brown
ornithine	Amino Acid	Urea cycle; Arginine and Proline Metabolism	1493	LC/MS Pos Early	2800	133.097	3184-13-2	6262	C00077	HMDB0000214	-0.0488361	0.788578	black
orotate	Nucleotide	Pyrimidine Metabolism, Orotate containing	1505	LC/MS Polar	1638.1	155.01	65-86-1	967	C00295	HMDB0000226	0.106602	0.753519	blue
orotidine	Nucleotide	Pyrimidine Metabolism, Orotate containing	35172	LC/MS Polar	2250	287.052	314-50-1	92751	C01103	HMDB0000788	0.157543	0.285203	purple
oxalate (ethanedioate)	Cofactors and Vitamins	Ascorbate and Aldarate Metabolism	20694	LC/MS Neg	603	88.988	144-62-7	971	C00209	HMDB0002329	0.0138723	0.940226	blue
palmitate (16:0)	Lipid	Long Chain Fatty Acid	1336	LC/MS Neg	5618	255.233	57-10-3	985	C00249	HMDB0000220	0.0343398	0.924542	purple
palmitic amide	Lipid	Fatty Acid, Amide	42095	LC/MS Pos Late	1661	256.264	629-54-9	69421		HMDB0012273	0.118342	0.820554	blue
palmitoleate (16:1n7)	Lipid	Long Chain Fatty Acid	33447	LC/MS Neg	5475	253.217	373-49-9	445638	C08362	HMDB0003229	0.0785288	0.924542	grey
palmitoleoyl-arachidonoyl-glycerol (16:1/20:4) [2]*	Lipid	Diacylglycerol	57406	LC/MS Pos Late	2528	632.525					0.296683	0.658703	brown
palmitoleoylcarnitine (C16:1)*	Lipid	Fatty Acid Metabolism(Acyl Carnitine)	53223	LC/MS Pos Late	1357	398.327					0.0772546	0.874433	grey
palmitoleoyl-linoleoyl-glycerol (16:1/18:2) [1]*	Lipid	Diacylglycerol	54967	LC/MS Pos Late	2664	608.525					0.14785	0.810221	yellow
palmitoloelycholine	Lipid	Fatty Acid Metabolism (Acyl Choline)	53257	LC/MS Pos Late	1385	340.321					0.0805445	0.909238	blue
palmitoyl dihydrosphingomyelin (d18:0/16:0)*	Lipid	Sphingolipid Metabolism	52434	LC/MS Pos Late	2290	705.591		9939965		HMDB0062665	0.00814499	0.927757	magenta
palmitoyl ethanolamide	Lipid	Endocanbinoid	38165	LC/MS Neg	6300	298.275	544-31-0	4671	C16512	HMDB0002100	0.0100944	0.930261	pink
palmitoyl sphingomyelin (d18:1/16:0)	Lipid	Sphingolipid Metabolism	37506	LC/MS Pos Late	2168	703.575					0.0437069	0.754715	brown
palmitoyl-arachidonoyl-glycerol (16:0/20:4) [1]*	Lipid	Diacylglycerol	54957	LC/MS Pos Late	2916	634.54					0.122978	0.819074	yellow
palmitoyl-arachidonoyl-glycerol (16:0/20:4) [2]*	Lipid	Diacylglycerol	54958	LC/MS Pos Late	3015	634.54					0.00303974	0.946721	red
palmitoylcarnitine (C16)	Lipid	Fatty Acid Metabolism(Acyl Carnitine)	44681	LC/MS Pos Late	1425	400.342	2364-67-2	11953816	C02990	HMDB0000222	0.00538999	0.943715	pink
palmitoylcholine	Lipid	Fatty Acid Metabolism (Acyl Choline)	52944	LC/MS Pos Late	1482	342.337					0.217422	0.754715	brown
palmitoyl-linoleoyl-glycerol (16:0/18:2) [1]*	Lipid	Diacylglycerol	52633	LC/MS Pos Late	3080	610.54		9543695	C00165	HMDB0007103	0.267304	0.658703	grey
palmitoyl-linoleoyl-glycerol (16:0/18:2) [2]*	Lipid	Diacylglycerol	52634	LC/MS Pos Late	3197	610.54					0.372556	0.346357	brown
palmitoyl-oleoyl-glycerol (16:0/18:1) [1]*	Lipid	Diacylglycerol	54943	LC/MS Pos Late	3562	612.556					0.404211	0.357343	pink
palmitoyl-oleoyl-glycerol (16:0/18:1) [2]*	Lipid	Diacylglycerol	54942	LC/MS Pos Late	3695	612.556					0.294909	0.490338	brown
pantothenate (Vitamin B5)	Cofactors and Vitamins	Pantothete and CoA Metabolism	1508	LC/MS Neg	1498.7	218.103	79-83-4	6613	C00864	HMDB0000210	-0.13136	0.753519	tan
p-cresol sulfate	Amino Acid	Phenylalanine and Tyrosine Metabolism	36103	LC/MS Neg	2890	187.007	3233-58-7	4615423		HMDB0011635	-0.302671	0.689433	brown
p-cresol-glucuronide*	Amino Acid	Phenylalanine and Tyrosine Metabolism	48841	LC/MS Neg	2420	283.082		154035		HMDB0011686	0.0662131	0.924542	brown
pentadecanoate (15:0)	Lipid	Long Chain Fatty Acid	1361	LC/MS Neg	5521	241.217	1002-84-2	13849	C16537	HMDB0000826	0.0131249	0.937319	magenta
phenol sulfate	Amino Acid	Phenylalanine and Tyrosine Metabolism	32553	LC/MS Neg	2156	172.991		74426	C02180	HMDB0060015	0.119633	0.830626	blue
phenylacetylcarnitine	Peptide	Acetylated Peptides	48425	LC/MS Pos Early	3092	280.154					-0.035461	0.924948	grey
phenylacetylglutamate	Peptide	Acetylated Peptides	52925	LC/MS Pos Early	2357	266.102		11579826		HMDB0059772	-0.199472	0.753519	grey
phenylacetylglutamine	Peptide	Acetylated Peptides	35126	LC/MS Pos Early	2145	265.118	28047-15-6	92258	C04148	HMDB0006344	-0.111765	0.867608	blue
phenylacetylglycine	Peptide	Acetylated Peptides	33945	LC/MS Neg	2375	192.067	500-98-1	68144	C05598	HMDB0000821	-0.201962	0.753519	black
phenylacetylmethionine	Peptide	Acetylated Peptides	54736	LC/MS Pos Early	3198	268.1					0.0358927	0.838149	grey
phenylalanine	Amino Acid	Phenylalanine and Tyrosine Metabolism	64	LC/MS Pos Early	2878	166.086	63-91-2	6140	C00079	HMDB0000159	0.016554	0.897631	blue
phenylalanylglycine	Peptide	Dipeptide	41370	LC/MS Pos Early	2898	223.108		98207		HMDB0028995	0.0910423	0.788578	pink
phenylalanylleucine	Peptide	Dipeptide	40192	LC/MS Pos Early	3368	279.17					0.0245608	0.924948	green
phenylalanylphenylalanine	Peptide	Dipeptide	38150	LC/MS Pos Early	3373	313.155	2577-40-4	65104		HMDB0013302	0.0655514	0.874433	brown
phenylalanylserine	Peptide	Dipeptide	40016	LC/MS Neg	2333	251.104		9859812		HMDB0029004	-0.0312931	0.924948	grey
phenylalanyltryptophan	Peptide	Dipeptide	41377	LC/MS Pos Early	3325	352.166		14410593		HMDB0029006	-0.147895	0.662716	brown
phenyllactate (PLA)	Amino Acid	Phenylalanine and Tyrosine Metabolism	22130	LC/MS Neg	2208	165.056	828-01-3	3848	C01479	HMDB0000779	-0.0155356	0.924948	grey
phenylpyruvate	Amino Acid	Phenylalanine and Tyrosine Metabolism	566	LC/MS Neg	2517.6	163.04	156-06-9	997	C00166	HMDB0000205	-0.0659589	0.878743	yellow
phosphate	Energy	Oxidative Phosphorylation	42109	LC/MS Pos Early	576	98.9842	14265-44-2	1004	C00009	HMDB0001429	0.0411955	0.874433	red
phosphatidylcholine (14:0/14:0, 16:0/12:0)	Lipid	Phospholipid Metabolism	53177	LC/MS Pos Late	1972	678.507					-0.274974	0.753519	brown
phosphatidylcholine (15:0/18:1, 17:0/16:1)*	Lipid	Phospholipid Metabolism	53178	LC/MS Pos Late	2224	746.569					-0.0830102	0.797384	brown
phosphatidylcholine (16:0/22:5n3, 18:1/20:4)*	Lipid	Phospholipid Metabolism	52719	LC/MS Pos Late	2100	808.585					-0.0706546	0.783393	blue
phosphatidylcholine (18:0/20:2, 20:0/18:2)*	Lipid	Phospholipid Metabolism	53192	LC/MS Pos Late	2639	814.632					0.112068	0.788578	yellow
phosphatidylethanolamine (P-18:1/20:4, P-16:0/22:5n3)*	Lipid	Phospholipid Metabolism	57411	LC/MS Pos Late	2243	750.543					0.00413118	0.943715	red
phosphocholine	Lipid	Phospholipid Metabolism	34396	LC/MS Pos Early	700	184.073	626852	1014	C00588	HMDB0001565	-0.193349	0.285203	brown
picolinate	Amino Acid	Tryptophan Metabolism	1512	LC/MS Pos Early	910	124.039	98-98-6	1018	C10164	HMDB0002243	-0.115066	0.788578	red
pimelate (heptanedioate)	Lipid	Fatty Acid, Dicarboxylate	15704	LC/MS Polar	2745	159.066	111-16-0	385	C02656	HMDB0000857	-0.00136567	0.946721	grey
pimeloylcarnitine/3-methyladipoylcarnitine (C7-DC)	Lipid	Fatty Acid Metabolism(Acyl Carnitine)	53224	LC/MS Pos Early	2773	304.175					0.274641	0.370581	yellow
pipecolate	Amino Acid	Lysine Metabolism	1444	LC/MS Pos Early	2200	130.086	535-75-1	849	C00408	HMDB0000070	-0.186265	0.753519	grey
pregn steroid monosulfate*	Lipid	Steroid	32619	LC/MS Neg	5000	397.205	1247-64-9	20845972		HMDB0000774	-0.0963396	0.874433	grey
pregnanediol-3-glucuronide	Lipid	Steroid	40708	LC/MS Neg	5145	495.296		123796	C03033	HMDB0010318	0.385476	0.658703	grey
pregnanolone/allopregnanolone sulfate	Lipid	Steroid	48394	LC/MS Neg	5160	397.205					0.0627316	0.924542	blue
pregnen-diol disulfate*	Lipid	Steroid	32562	LC/MS Neg	3868	238.077					0.127852	0.867608	grey
pregnenolone sulfate	Lipid	Steroid	38170	LC/MS Neg	5100	395.19	1247-64-9	20845972		HMDB0000774	-0.0566409	0.918261	grey
pristanate	Lipid	Fatty Acid, Branched	38271	LC/MS Neg	5773	297.28	1189-37-3	123929		HMDB0000795	0.0282978	0.924948	yellow
proline	Amino Acid	Urea cycle; Arginine and Proline Metabolism	1898	LC/MS Pos Early	1603	116.071	147-85-3	145742	C00148	HMDB0000162	-0.0852636	0.753519	black
prolylalanine	Peptide	Dipeptide	40705	LC/MS Pos Early	2290	187.108		418041		HMDB0029010	0.0635142	0.887984	red
prolylglycine	Peptide	Dipeptide	40703	LC/MS Pos Early	2136	173.092		98206		HMDB0011178	-0.118328	0.874433	tan
prolylhydroxyproline	Amino Acid	Urea cycle; Arginine and Proline Metabolism	35127	LC/MS Pos Early	2128	229.118	18684-24-7	11902892		HMDB0006695	-0.0974539	0.84262	greenyellow
prolylproline	Peptide	Dipeptide	40731	LC/MS Pos Early	2475	213.123		263469		HMDB0011180	-0.0470554	0.895336	blue
prolylvaline	Peptide	Dipeptide	40720	LC/MS Pos Early	2781	215.139					0.0330235	0.924948	black
propionylcarnitine (C3)	Lipid	Fatty Acid Metabolism (also BCAA Metabolism)	32452	LC/MS Pos Early	2590	218.139	17298-37-2	107738	C03017	HMDB0000824	-0.0370586	0.889929	blue
propionylglycine (C3)	Lipid	Fatty Acid Metabolism (also BCAA Metabolism)	31932	LC/MS Neg	960	130.051	21709-90-0	98681		HMDB0000783	-0.240416	0.542683	grey
pseudouridine	Nucleotide	Pyrimidine Metabolism, Uracil containing	33442	LC/MS Neg	1100	243.062	1445-07-4	15047	C02067	HMDB0000767	0.0769821	0.658703	purple
pyridoxate	Cofactors and Vitamins	Vitamin B6 Metabolism	31555	LC/MS Neg	2185	182.046	82-82-6	6723	C00847	HMDB0000017	-0.198938	0.788578	blue
pyroglutamine*	Amino Acid	Glutamate Metabolism	46225	LC/MS Pos Early	1900	129.066	2353-44-8	134508		HMDB0062558	-0.0764712	0.873673	blue
pyroglutamylglutamine	Peptide	Dipeptide	22194	LC/MS Neg	855	256.094	109481-23-4	11010621		HMDB0039229	-0.0593679	0.867608	brown
pyroglutamylglycine	Peptide	Dipeptide	31522	LC/MS Neg	828.2	185.057				HMDB0061890	0.0443026	0.891357	purple
pyroglutamylvaline	Peptide	Dipeptide	32394	LC/MS Neg	1755	227.104	21282-10-0	152416		HMDB0094651	-0.0454379	0.874433	grey
pyruvate	Carbohydrate	Glycolysis, Gluconeogenesis, and Pyruvate Metabolism	48990	LC/MS Polar	1083	87.0088	127-17-3	1060	C00022	HMDB0000243	-0.05904	0.880414	grey
quinolinate	Cofactors and Vitamins	Nicotite and Nicotimide Metabolism	1899	LC/MS Pos Early	845	168.029	89-00-9	1066	C03722	HMDB0000232	0.198151	0.346357	brown
retinol (Vitamin A)	Cofactors and Vitamins	Vitamin A Metabolism	1806	LC/MS Pos Late	1636	269.226	68-26-8	9904001	C19962	HMDB0000305	0.0662643	0.788578	purple
ribitol	Carbohydrate	Pentose Metabolism	15772	LC/MS Polar	1789.6	151.061	488-81-3		C00474	HMDB0000508	-0.0168802	0.924542	brown
ribonate (ribonolactone)	Carbohydrate	Pentose Metabolism	27731	LC/MS Polar	2425	165.041	17812-24-7	5460677	C01685	HMDB0000867	0.040505	0.902141	green
ribose	Carbohydrate	Pentose Metabolism	1471	LC/MS Polar	1508.2	195.051	613-83-2	5779	C00121	HMDB0000283	0.137091	0.754715	brown
S-1-pyrroline-5-carboxylate	Amino Acid	Glutamate Metabolism	42370	LC/MS Pos Early	1528	114.055	2906-39-0	1196	C04322	HMDB0001301	-0.134485	0.658703	grey
S-adenosylhomocysteine (SAH)	Amino Acid	Methionine, Cysteine, SAM and Taurine Metabolism	42382	LC/MS Neg	1832.4	383.114	979-92-0	439155	C00021	HMDB0000939	0.0592505	0.490338	black
sarcosine	Amino Acid	Glycine, Serine and Threonine Metabolism	1516	LC/MS Pos Early	1280	90.055	107-97-1	1088	C00213	HMDB0000271	-0.113197	0.753519	brown
sebacate (decanedioate)	Lipid	Fatty Acid, Dicarboxylate	32398	LC/MS Neg	1788	201.113	111-20-6	5192	C08277	HMDB0000792	-0.118241	0.797707	yellow
serine	Amino Acid	Glycine, Serine and Threonine Metabolism	1648	LC/MS Pos Early	1239	106.05	56-45-1	5951	C00065	HMDB0000187	-0.0899159	0.658703	grey
serotonin	Amino Acid	Tryptophan Metabolism	2342	LC/MS Pos Early	2550	177.102	50-67-9	5202	C00780	HMDB0000259	-0.0316757	0.930261	green
serylalanine	Peptide	Dipeptide	42049	LC/MS Pos Early	2115	177.087		17958834		HMDB0029032	0.102794	0.764577	brown
seryltyrosine	Peptide	Dipeptide	42077	LC/MS Neg	1436	267.099		4575735		HMDB0029051	0.130801	0.660921	brown
S-methylcysteine	Amino Acid	Methionine, Cysteine, SAM and Taurine Metabolism	39592	LC/MS Neg	880	134.028	1187-84-4	24417		HMDB0002108	-0.1954	0.658703	green
S-methylmethionine	Amino Acid	Methionine, Cysteine, SAM and Taurine Metabolism	38127	LC/MS Pos Early	2584	164.074	13065-25-3	458		HMDB0038670	-0.205631	0.810221	blue
spermidine	Amino Acid	Polyamine Metabolism	485	LC/MS Pos Late	700	146.165	124-20-9	1102	C00315	HMDB0001257	0.142908	0.779053	red
sphinganine-1-phosphate	Lipid	Sphingolipid Metabolism	52605	LC/MS Pos Late	1431	382.272	19794-97-9	644260	C01120	HMDB0001383	-0.0490303	0.810221	magenta
sphingomyelin	Lipid	Sphingolipid Metabolism	19503	LC/MS Pos Late	2400	731.606	85187-10-6	5283588	C00550	HMDB0001348	0.0576538	0.754715	grey
sphingomyelin (d17:2/16:0, d18:2/15:0)*	Lipid	Sphingolipid Metabolism	57483	LC/MS Pos Late	1837	687.544					0.0704545	0.823103	brown
sphingomyelin (d18:0/18:0, d19:0/17:0)*	Lipid	Sphingolipid Metabolism	57473	LC/MS Pos Late	2362	733.622					0.179252	0.54541	magenta
sphingomyelin (d18:0/20:0, d16:0/22:0)*	Lipid	Sphingolipid Metabolism	57476	LC/MS Pos Late	2600	761.653					0.0811432	0.810221	grey
sphingomyelin (d18:1/14:0, d16:1/16:0)*	Lipid	Sphingolipid Metabolism	42463	LC/MS Pos Late	1998	675.544		11433862		HMDB0012097	0.0133051	0.924948	grey
sphingomyelin (d18:1/15:0, d16:1/17:0)*	Lipid	Sphingolipid Metabolism	52433	LC/MS Pos Late	2082	689.559					0.0392869	0.867608	blue
sphingomyelin (d18:1/17:0, d17:1/18:0, d19:1/16:0)	Lipid	Sphingolipid Metabolism	52615	LC/MS Pos Late	2312	717.591					0.0713678	0.754715	tan
sphingomyelin (d18:1/18:1, d18:2/18:0)	Lipid	Sphingolipid Metabolism	37529	LC/MS Pos Late	2167	729.591		6443882	C00550	HMDB0012101	0.0995504	0.56057	green
sphingomyelin (d18:1/19:0, d19:1/18:0)*	Lipid	Sphingolipid Metabolism	57475	LC/MS Pos Late	2330	745.622					0.0951698	0.878743	black
sphingomyelin (d18:1/20:0, d16:1/22:0)*	Lipid	Sphingolipid Metabolism	48490	LC/MS Pos Late	2685	759.638					0.0604541	0.753519	yellow
sphingomyelin (d18:1/20:1, d18:2/20:0)*	Lipid	Sphingolipid Metabolism	48491	LC/MS Pos Late	2383	757.622					0.0449441	0.799905	grey
sphingomyelin (d18:1/20:2, d18:2/20:1, d16:1/22:2)*	Lipid	Sphingolipid Metabolism	57481	LC/MS Pos Late	2039	755.606					0.108708	0.754715	pink
sphingomyelin (d18:1/21:0, d17:1/22:0, d16:1/23:0)*	Lipid	Sphingolipid Metabolism	52495	LC/MS Pos Late	2793	773.653					-0.00308193	0.943887	greenyellow
sphingomyelin (d18:1/22:1, d18:2/22:0, d16:1/24:1)*	Lipid	Sphingolipid Metabolism	48493	LC/MS Pos Late	2666	785.653					0.0570395	0.757128	blue
sphingomyelin (d18:1/22:2, d18:2/22:1, d16:1/24:2)*	Lipid	Sphingolipid Metabolism	57477	LC/MS Pos Late	2209	783.638					0.0325306	0.880373	red
sphingomyelin (d18:1/24:1, d18:2/24:0)*	Lipid	Sphingolipid Metabolism	47153	LC/MS Pos Late	3033	813.684					0.0224568	0.879708	pink
sphingomyelin (d18:1/25:0, d19:0/24:1, d20:1/23:0, d19:1/24:0)*	Lipid	Sphingolipid Metabolism	57478	LC/MS Pos Late	3220	829.716					0.146575	0.753519	blue
sphingomyelin (d18:2/14:0, d18:1/14:1)*	Lipid	Sphingolipid Metabolism	47154	LC/MS Pos Late	1860	673.528					0.0143222	0.924948	yellow
sphingomyelin (d18:2/16:0, d18:1/16:1)*	Lipid	Sphingolipid Metabolism	42459	LC/MS Pos Late	2002	701.559					0.0363964	0.814336	brown
sphingomyelin (d18:2/18:1)*	Lipid	Sphingolipid Metabolism	57474	LC/MS Pos Late	1904	727.575					0.0604755	0.782497	red
sphingomyelin (d18:2/21:0, d16:2/23:0)*	Lipid	Sphingolipid Metabolism	57480	LC/MS Pos Late	2330	771.638					0.0415887	0.874433	yellow
sphingomyelin (d18:2/23:0, d18:1/23:1, d17:1/24:1)*	Lipid	Sphingolipid Metabolism	52435	LC/MS Pos Late	2845	799.669					0.0221445	0.892516	pink
sphingomyelin (d18:2/23:1)*	Lipid	Sphingolipid Metabolism	57482	LC/MS Pos Late	2315	797.653					0.0414009	0.874433	magenta
sphingomyelin (d18:2/24:1, d18:1/24:2)*	Lipid	Sphingolipid Metabolism	52437	LC/MS Pos Late	2635	811.669					0.0486741	0.810221	black
sphingomyelin (d18:2/24:2)*	Lipid	Sphingolipid Metabolism	57479	LC/MS Pos Late	2215	809.653					-0.0255925	0.909238	blue
sphingosine	Lipid	Sphingolipid Metabolism	17747	LC/MS Pos Late	1393	300.29	123-78-4	5353955	C00319	HMDB0000252	0.0448206	0.877333	brown
sphingosine 1-phosphate	Lipid	Sphingolipid Metabolism	34445	LC/MS Polar	1850	378.241	26993-30-6	5283560	C06124	HMDB0000277	0.00197686	0.943887	grey
stearamide	Lipid	Fatty Acid, Amide	37487	LC/MS Pos Late	1800	284.295	124-26-5	31292	C13846	HMDB0034146	0.0178538	0.924948	grey
stearate (18:0)	Lipid	Long Chain Fatty Acid	1358	LC/MS Neg	5872	283.264	57-11-4	5281	C01530	HMDB0000827	0.0384443	0.884416	blue
stearidonate (18:4n3)	Lipid	Polyunsaturated Fatty Acid (n3 and n6)	33969	LC/MS Neg	5395	275.202	20290-75-9	5312508	C16300	HMDB0006547	0.057117	0.924948	purple
stearoyl-arachidonoyl-glycerol (18:0/20:4) [1]*	Lipid	Diacylglycerol	57450	LC/MS Pos Late	3404	662.572					0.0802513	0.788578	purple
stearoyl-arachidonoyl-glycerol (18:0/20:4) [2]*	Lipid	Diacylglycerol	57449	LC/MS Pos Late	3522	662.572					0.102922	0.753519	black
stearoylcarnitine (C18)	Lipid	Fatty Acid Metabolism(Acyl Carnitine)	34409	LC/MS Pos Late	1485	428.373	25597-09-5	52922056		HMDB0000848	0.0145598	0.924948	brown
stearoylcholine*	Lipid	Fatty Acid Metabolism (Acyl Choline)	57464	LC/MS Pos Late	1520	370.368					0.262448	0.753519	brown
suberate (octanedioate)	Lipid	Fatty Acid, Dicarboxylate	15730	LC/MS Polar	2577.6	173.082	505-48-6	10457	C08278	HMDB0000893	0.0579308	0.874433	green
suberoylcarnitine (C8-DC)	Lipid	Fatty Acid Metabolism(Acyl Carnitine)	52990	LC/MS Pos Early	2964	318.191					0.00744381	0.943887	pink
succinate	Energy	TCA Cycle	1437	LC/MS Polar	3149	117.019	110-15-6	1110	C00042	HMDB0000254	-0.0242802	0.878743	green
succinylcarnitine (C4)	Energy	TCA Cycle	37058	LC/MS Pos Early	2291	262.128	256928-74-2			HMDB0061717	0.0887814	0.753519	yellow
taurine	Amino Acid	Methionine, Cysteine, SAM and Taurine Metabolism	2125	LC/MS Neg	690	124.007	107-35-7	1123	C00245	HMDB0000251	-0.0968973	0.735863	tan
tauro-beta-muricholate	Lipid	Primary Bile Acid Metabolism	33983	LC/MS Neg	4774	514.284	25696-60-0	168408		HMDB0000932	-0.04213	0.916376	yellow
taurochenodeoxycholate	Lipid	Primary Bile Acid Metabolism	18494	LC/MS Neg	5250	498.289	516-35-8	387316	C05465	HMDB0000951	-0.533525	0.346357	blue
taurocholate	Lipid	Primary Bile Acid Metabolism	18497	LC/MS Neg	5150	514.284	81-24-3	6675	C05122	HMDB0000036	-0.376257	0.670325	greenyellow
taurocholenate sulfate	Lipid	Secondary Bile Acid Metabolism	32807	LC/MS Neg	4750	279.614					-0.147398	0.823103	blue
taurodeoxycholate	Lipid	Secondary Bile Acid Metabolism	12261	LC/MS Neg	5257.4	498.289	516-50-7	2733768	C05463	HMDB0000896	-0.563046	0.357343	purple
taurolithocholate 3-sulfate	Lipid	Secondary Bile Acid Metabolism	36850	LC/MS Neg	5026.7	280.622	15324-65-9	440071	C03642	HMDB0002580	-0.296172	0.658703	brown
tauroursodeoxycholate	Lipid	Secondary Bile Acid Metabolism	39378	LC/MS Neg	5025	498.289	14605-22-2	12443252		HMDB0000874	-0.0414267	0.916296	grey
tetradecanedioate (C14)	Lipid	Fatty Acid, Dicarboxylate	35669	LC/MS Neg	4000	257.176	821-38-5	13185	C11002	HMDB0000872	-0.207778	0.753519	blue
threonate	Cofactors and Vitamins	Ascorbate and Aldarate Metabolism	27738	LC/MS Polar	2384	135.03	734111	151152	C01620	HMDB0000943	0.00375068	0.946721	grey
threonine	Amino Acid	Glycine, Serine and Threonine Metabolism	1284	LC/MS Pos Early	1514	120.066	72-19-5	6288	C00188	HMDB0000167	-0.112007	0.658703	tan
threonylalanine	Peptide	Dipeptide	42052	LC/MS Pos Early	2196	191.103		18218243		HMDB0029054	0.0132709	0.924948	brown
threonylphenylalanine	Peptide	Dipeptide	31530	LC/MS Neg	2322	265.119		4099798		HMDB0029068	-0.0516082	0.877333	red
thyroxine	Amino Acid	Phenylalanine and Tyrosine Metabolism	2761	LC/MS Neg	4808	775.679	51-48-9	5819	C01829	HMDB0000248	0.00413879	0.943715	brown
tigloylglycine	Amino Acid	Leucine, Isoleucine and Valine Metabolism	48980	LC/MS Neg	1886	156.067	35842-45-6	6441567		HMDB0000959	0.0494604	0.887984	purple
tiglyl carnitine (C5)	Amino Acid	Leucine, Isoleucine and Valine Metabolism	35428	LC/MS Pos Early	2962	244.154	64681-36-3	91825636		HMDB0002366	0.0587791	0.874433	purple
trans-urocanate	Amino Acid	Histidine Metabolism	607	LC/MS Pos Early	2285	139.05	104-98-3	736715	C00785	HMDB0000301	0.125001	0.753519	blue
tricosanoyl sphingomyelin (d18:1/23:0)*	Lipid	Sphingolipid Metabolism	52436	LC/MS Pos Late	3200	801.684		46891684	C00550	HMDB0012105	0.00543873	0.941985	pink
trigonelline (N'-methylnicotinate)	Cofactors and Vitamins	Nicotite and Nicotimide Metabolism	32401	LC/MS Pos Early	1388	138.055	535-83-1	5570	C01004	HMDB0000875	-0.587154	0.346357	pink
trimethylamine N-oxide	Lipid	Phospholipid Metabolism	40406	LC/MS Pos Early	2100	76.0757	1184-78-7	1145	C01104	HMDB0000925	-0.0142144	0.937319	grey
tryptophan	Amino Acid	Tryptophan Metabolism	54	LC/MS Pos Early	2986	205.097	73-22-3	6305	C00078	HMDB0000929	0.020076	0.878743	pink
tryptophan betaine	Amino Acid	Tryptophan Metabolism	37097	LC/MS Pos Early	2673	247.144	487-58-1	42106	C09213	HMDB0061115	0.419691	0.754715	brown
tryptophylasparagine	Peptide	Dipeptide	40661	LC/MS Neg	2320	317.125		18218248		HMDB0029078	0.0878851	0.8087	yellow
tryptophylleucine	Peptide	Dipeptide	40080	LC/MS Neg	3910	316.167		323786		HMDB0029087	-0.143208	0.604896	red
tyramine O-sulfate	Amino Acid	Phenylalanine and Tyrosine Metabolism	48408	LC/MS Neg	1565	216.034	30223-92-8	153005		HMDB0006409	-0.00504906	0.943887	grey
tyrosine	Amino Acid	Phenylalanine and Tyrosine Metabolism	1299	LC/MS Pos Early	2430	182.081	60-18-4	6057	C00082	HMDB0000158	-0.0142154	0.924542	black
tyrosylglutamine	Peptide	Dipeptide	41459	LC/MS Neg	1612	308.125					-0.0176598	0.924948	brown
tyrosylserine	Peptide	Dipeptide	54767	LC/MS Neg	1548	267.099					0.139864	0.753519	grey
uracil	Nucleotide	Pyrimidine Metabolism, Uracil containing	605	LC/MS Polar	1089.7	111.02	66-22-8	1174	C00106	HMDB0000300	-0.0268766	0.884416	green
urate	Nucleotide	Purine Metabolism, (Hypo)Xanthine/Inosine containing	1604	LC/MS Neg	757.1	167.021	69-93-2	1175	C00366	HMDB0000289	0.0189346	0.887984	yellow
urea	Amino Acid	Urea cycle; Arginine and Proline Metabolism	1670	LC/MS Pos Early	700	121.072	57-13-6	1176	C00086	HMDB0000294	0.0672331	0.782011	pink
uridine	Nucleotide	Pyrimidine Metabolism, Uracil containing	606	LC/MS Neg	1457.6	243.062	58-96-8	6029	C00299	HMDB0000296	-0.00575851	0.937822	blue
ursodeoxycholate	Lipid	Secondary Bile Acid Metabolism	1605	LC/MS Neg	5055	391.285	128-13-2	31401	C07880	HMDB0000946	-0.505254	0.346357	black
valerate (5:0)	Lipid	Short Chain Fatty Acid	33443	LC/MS Neg	1718	101.061	109-52-4	7991	C00803	HMDB0000892	-0.127746	0.658703	grey
valine	Amino Acid	Leucine, Isoleucine and Valine Metabolism	1649	LC/MS Pos Early	2479	118.086	72-18-4	6287	C00183	HMDB0000883	0.0104835	0.924948	blue
valylalanine	Peptide	Dipeptide	41518	LC/MS Pos Early	2520	189.123		334517		HMDB0029120	0.021636	0.924948	yellow
valylarginine	Peptide	Dipeptide	42072	LC/MS Pos Early	3101	274.187		4266827		HMDB0029121	-0.0222761	0.924948	green
valylleucine	Peptide	Dipeptide	39994	LC/MS Pos Early	3138	231.17		352039		HMDB0029131	-0.103939	0.753519	brown
vanillactate	Amino Acid	Phenylalanine and Tyrosine Metabolism	54910	LC/MS Neg	1625	211.061	2475-56-1	160637		HMDB0000913	0.247658	0.19903	brown
vanillic alcohol sulfate	Amino Acid	Phenylalanine and Tyrosine Metabolism	48733	LC/MS Neg	1808	233.012					-0.0642886	0.910384	brown
vanillylmandelate (VMA)	Amino Acid	Phenylalanine and Tyrosine Metabolism	1567	LC/MS Neg	941	197.046	55-10-7	736172	C05584	HMDB0000291	0.149005	0.582534	green
xanthine	Nucleotide	Purine Metabolism, (Hypo)Xanthine/Inosine containing	3147	LC/MS Polar	2023	151.026	69-89-6	1188	C00385	HMDB0000292	0.0831284	0.754715	tan
xanthosine	Nucleotide	Purine Metabolism, (Hypo)Xanthine/Inosine containing	15136	LC/MS Neg	1075	283.068	146-80-5	64959	C01762	HMDB0000299	0.0428034	0.788578	brown
xanthurenate	Amino Acid	Tryptophan Metabolism	15679	LC/MS Neg	1476	204.03	59-00-7	5699	C02470	HMDB0000881	-0.137471	0.753519	grey
ximenoylcarnitine (C26:1)*	Lipid	Fatty Acid Metabolism(Acyl Carnitine)	57517	LC/MS Pos Late	1607	538.483					0.230165	0.346357	grey
xylose	Carbohydrate	Pentose Metabolism	15581	LC/MS Polar	1727	195.051	58-86-6	135191	C00181	HMDB0000098	-0.312206	0.658703	tan

## Sheet: blue
Supplementary table 6 - blue. Metabolomic pathway analysis of metabolites in the blue module which comprises 84 metabolites. Light red fill with dark red text cells indicate KEGG pathways that are significant at 10% Holm-Bonferroni multiple correction. Adjusted p-values are obtained by Benjamini and Hochberg (1995) method, while impact values (between 0 and 1) show the average importance of the s…
KEGG Pathway	Total	Expected	Hits	Metabolites hits	p-value	-log10 p-value	Holm–Bonferroni	Adjusted p-value	Impact
Glycerophospholipid metabolism	39	0.74533	5	Phosphatidylethanolamine; Phosphatidylcholine; Glycerol 3-phosphate; Phosphorylcholine; PA(16:0/16:0).	0.00072364	7.2312	0.057892	0.057892	0.40744
Pyrimidine metabolism	60	1.1467	5		0.0050874	5.281	0.40191	0.2035	0.08106
Phenylalanine metabolism	45	0.85999	4		0.0098158	4.6238	0.76563	0.26176	0.15926
Valine, leucine and isoleucine biosynthesis	27	0.516	3		0.013864	4.2785	1	0.27727	0.03975
Glycerolipid metabolism	32	0.61155	3		0.021998	3.8168	1	0.35197	0.04021
Valine, leucine and isoleucine degradation	40	0.76444	3		0.03942	3.2335	1	0.5256	0.02232
Aminoacyl-tRNA biosynthesis	75	1.4333	4		0.052886	2.9396	1	0.53011	0
Ascorbate and aldarate metabolism	45	0.85999	3		0.053011	2.9373	1	0.53011	0.04124
Sphingolipid metabolism	25	0.47777	2		0.081184	2.511	1	0.65805	0.03529
Phenylalanine, tyrosine and tryptophan biosynthesis	27	0.516	2		0.092752	2.3778	1	0.65805	0.00062
Pantothenate and CoA biosynthesis	27	0.516	2		0.092752	2.3778	1	0.65805	0.03843
beta-Alanine metabolism	28	0.53511	2		0.098708	2.3156	1	0.65805	0.11101
D-Arginine and D-ornithine metabolism	8	0.15289	1		0.14324	1.9433	1	0.88146	0
Glutathione metabolism	38	0.72622	2		0.16318	1.8129	1	0.93248	0.03608
Arginine and proline metabolism	77	1.4715	3		0.18049	1.7121	1	0.96263	0.04586
Primary bile acid biosynthesis	47	0.89821	2		0.22604	1.4871	1	1	0.01383
Glycosylphosphatidylinositol(GPI)-anchor biosynthesis	14	0.26755	1		0.23729	1.4385	1	1	0.0439
Starch and sucrose metabolism	50	0.95555	2		0.24746	1.3965	1	1	0.04222
Glyoxylate and dicarboxylate metabolism	50	0.95555	2		0.24746	1.3965	1	1	0.16185
Linoleic acid metabolism	15	0.28666	1		0.25195	1.3785	1	1	0
Pentose and glucuronate interconversions	53	1.0129	2		0.26897	1.3131	1	1	0.16727
Taurine and hypotaurine metabolism	20	0.38222	1		0.32122	1.1356	1	1	0
Ether lipid metabolism	23	0.43955	1		0.35973	1.0224	1	1	0.04204
Alanine, aspartate and glutamate metabolism	24	0.45866	1		0.37208	0.98863	1	1	0
Tyrosine metabolism	76	1.4524	2		0.43	0.84398	1	1	0.10175
alpha-Linolenic acid metabolism	29	0.55422	1		0.43044	0.84294	1	1	0
Tryptophan metabolism	79	1.5098	2		0.44984	0.79887	1	1	0.08276
Pentose phosphate pathway	32	0.61155	1		0.46287	0.7703	1	1	0.02181
Propanoate metabolism	35	0.66888	1		0.49349	0.70624	1	1	0
Ubiquinone and other terpenoid-quinone biosynthesis	36	0.68799	1		0.50332	0.68654	1	1	0.04886
Inositol phosphate metabolism	39	0.74533	1		0.53168	0.63171	1	1	0
Nitrogen metabolism	39	0.74533	1		0.53168	0.63171	1	1	0
Histidine metabolism	44	0.84088	1		0.57547	0.55257	1	1	0.06765
Glycine, serine and threonine metabolism	48	0.91732	1		0.60759	0.49825	1	1	0.00047
Arachidonic acid metabolism	62	1.1849	1		0.70237	0.35329	1	1	0
Amino sugar and nucleotide sugar metabolism	88	1.6818	1		0.82268	0.19519	1	1	0
Steroid hormone biosynthesis	99	1.892	1		0.85782	0.15336	1	1	0.02959
			72

## Sheet: brown
Supplementary table 6 - brown. Metabolomic pathway analysis of metabolites in the brown module which comprises 162 metabolites. Light red fill with dark red text cells indicate KEGG pathways that are significant at 10% Holm-Bonferroni multiple correction. Adjusted p-values are obtained by Benjamini and Hochberg (1995) method, while impact values (between 0 and 1) show the average importance of th…
KEGG Pathway	Total	Expected	Hits	Metabolites hits	p-value	-log10 p-value	Holm–Bonferroni	Adjusted p-value	Impact
Glycerophospholipid metabolism	39	0.71292	5	Phosphatidylethanolamine; Phosphatidylcholine; LysoPC(18:1(9Z)); Glycerylphosphorylethanolamine; Glycerophosphocholine.	0.00058709	7.4403	0.046967	0.046967	0.25749
Linoleic acid metabolism	15	0.2742	2		0.029491	3.5237	1	1	0
Taurine and hypotaurine metabolism	20	0.3656	2		0.050384	2.9881	1	1	0.09173
Ether lipid metabolism	23	0.42044	2		0.064826	2.736	1	1	0
Valine, leucine and isoleucine biosynthesis	27	0.49356	2		0.085932	2.4542	1	1	0.12242
Pantothenate and CoA biosynthesis	27	0.49356	2		0.085932	2.4542	1	1	0.2538
Propanoate metabolism	35	0.6398	2		0.13308	2.0168	1	1	0.02923
Nitrogen metabolism	39	0.71292	2		0.15848	1.8422	1	1	0
Arginine and proline metabolism	77	1.4076	3		0.16453	1.8046	1	1	0.05441
Valine, leucine and isoleucine degradation	40	0.7312	2		0.16496	1.802	1	1	0.01657
Galactose metabolism	41	0.74948	2		0.1715	1.7632	1	1	0.03193
Tryptophan metabolism	79	1.4441	3		0.17357	1.7512	1	1	0.06877
D-Glutamine and D-glutamate metabolism	11	0.20108	1		0.18402	1.6927	1	1	0.1123
Histidine metabolism	44	0.80432	2		0.19137	1.6536	1	1	0.00611
Glycosylphosphatidylinositol(GPI)-anchor biosynthesis	14	0.25592	1		0.22817	1.4777	1	1	0.0439
Purine metabolism	92	1.6818	3		0.23539	1.4465	1	1	0.0903
Cysteine and methionine metabolism	56	1.0237	2		0.27303	1.2982	1	1	0.02224
Caffeine metabolism	21	0.38388	1		0.32231	1.1322	1	1	0
Alanine, aspartate and glutamate metabolism	24	0.43872	1		0.35913	1.0241	1	1	0.17664
beta-Alanine metabolism	28	0.51184	1		0.4052	0.90338	1	1	0
alpha-Linolenic acid metabolism	29	0.53012	1		0.4162	0.8766	1	1	0
Pyruvate metabolism	32	0.58496	1		0.44802	0.80292	1	1	0.04728
Glycerolipid metabolism	32	0.58496	1		0.44802	0.80292	1	1	0.18847
Glutathione metabolism	38	0.69464	1		0.50666	0.67991	1	1	0.01095
Butanoate metabolism	40	0.7312	1		0.52482	0.64469	1	1	0
Nicotinate and nicotinamide metabolism	44	0.80432	1		0.5592	0.58124	1	1	0.03827
Glycine, serine and threonine metabolism	48	0.87744	1		0.59115	0.52569	1	1	0
Pyrimidine metabolism	60	1.0968	1		0.67401	0.39452	1	1	0
Arachidonic acid metabolism	62	1.1334	1		0.68612	0.37671	1	1	0
Aminoacyl-tRNA biosynthesis	75	1.371	1		0.75478	0.28132	1	1	0.05634
Steroid hormone biosynthesis	99	1.8097	1		0.84511	0.16828	1	1	0.01198
Porphyrin and chlorophyll metabolism	104	1.9011	1		0.85934	0.15159	1	1	0
			53

## Sheet: yellow
Supplementary table 6 - yellow. Metabolomic pathway analysis of metabolites in the yellow module which comprises 77 metabolites. Light red fill with dark red text cells indicate KEGG pathways that are significant at 10% Holm-Bonferroni multiple correction. Adjusted p-values are obtained by Benjamini and Hochberg (1995) method, while impact values (between 0 and 1) show the average importance of t…
KEGG Pathway	Total	Expected	Hits	Metabolites hits	p-value	-log10 p-value	Holm–Bonferroni	Adjusted p-value	Impact
Glycerophospholipid metabolism	39	0.48608	4	Phosphatidylethanolamine; Phosphatidylcholine; LysoPC(18:1(9Z)); PA(16:0/16:0).	0.001192	6.7321	0.095362	0.095362	0.33235
Primary bile acid biosynthesis	47	0.58579	3		0.019587	3.9329	1	0.49656	0.01851
Lysine degradation	47	0.58579	3		0.019587	3.9329	1	0.49656	0.06555
Citrate cycle (TCA cycle)	20	0.24927	2		0.024828	3.6958	1	0.49656	0.09872
Alanine, aspartate and glutamate metabolism	24	0.29913	2		0.034974	3.3531	1	0.55959	0.26496
Nitrogen metabolism	39	0.48608	2		0.083742	2.48	1	1	0.00067
Histidine metabolism	44	0.5484	2		0.10294	2.2736	1	1	0.01681
Glycine, serine and threonine metabolism	48	0.59826	2		0.11909	2.1279	1	1	0.04973
Glyoxylate and dicarboxylate metabolism	50	0.62318	2		0.1274	2.0604	1	1	0.02737
Glycosylphosphatidylinositol(GPI)-anchor biosynthesis	14	0.17449	1		0.16144	1.8236	1	1	0.0439
Linoleic acid metabolism	15	0.18695	1		0.17195	1.7605	1	1	0
Cyanoamino acid metabolism	16	0.19942	1		0.18234	1.7019	1	1	0
Taurine and hypotaurine metabolism	20	0.24927	1		0.22263	1.5022	1	1	0.33094
Arginine and proline metabolism	77	0.9597	2		0.24897	1.3904	1	1	0.00636
Phenylalanine, tyrosine and tryptophan biosynthesis	27	0.33652	1		0.28858	1.2428	1	1	0
Pantothenate and CoA biosynthesis	27	0.33652	1		0.28858	1.2428	1	1	0
beta-Alanine metabolism	28	0.34898	1		0.29754	1.2122	1	1	0
alpha-Linolenic acid metabolism	29	0.36145	1		0.3064	1.1829	1	1	0
Purine metabolism	92	1.1467	2		0.31927	1.1417	1	1	0.01546
Lysine biosynthesis	32	0.39884	1		0.33233	1.1016	1	1	0
Pyruvate metabolism	32	0.39884	1		0.33233	1.1016	1	1	0
Glycerolipid metabolism	32	0.39884	1		0.33233	1.1016	1	1	0.01247
Nicotinate and nicotinamide metabolism	44	0.5484	1		0.427	0.85097	1	1	0
Phenylalanine metabolism	45	0.56086	1		0.43427	0.83408	1	1	0.04875
Fatty acid metabolism	50	0.62318	1		0.46933	0.75645	1	1	0
Cysteine and methionine metabolism	56	0.69796	1		0.50863	0.67604	1	1	0
Arachidonic acid metabolism	62	0.77275	1		0.54511	0.60678	1	1	0
Aminoacyl-tRNA biosynthesis	75	0.93477	1		0.61538	0.48551	1	1	0.05634
			43
